# Supplementary material for: On the development of a semi-nonparametric generalized multinomial logit model for travel-related choices
Source: PLoS One. 2017 Oct 26;12(10):e0186689. doi: 10.1371/journal.pone.0186689 (PMC5658062; doi:10.1371/journal.pone.0186689)
Supplement: S1 Data — (CSV) [file pone.0186689.s002.csv]

id	autotime	iveh_trst	freq_trst	time_bic	time_wk	female	low_edu	low_inc	high_inc	auto	transit	bicyle	walk
1	3.6	3.6	6	6	18	0	0	0	0	1	0	0	0
2	2.88	3.6	4	6	18	0	0	0	0	0	0	0	1
3	23	14	6	47	140	0	0	1	0	1	0	0	0
4	3	8	1	9	26	0	1	0	0	1	0	0	0
5	26	29	4	120	360	0	0	0	0	0	1	0	0
6	0.75006	0.75006	6	1.2501	3.7503	0	0	1	0	1	0	0	0
7	2	7	6	5	14	0	0	1	0	1	0	0	0
8	23	120	0	85	256	1	0	1	0	1	0	0	0
9	4	3	6	11	33	0	0	0	0	1	0	0	0
10	4	3	5	11	34	0	0	0	0	1	0	0	0
11	39	45	5	138	415	0	0	0	1	1	0	0	0
12	7	5	4	23	68	0	0	0	0	1	0	0	0
13	9	10	4	32	97	0	0	0	0	1	0	0	0
14	0.51428571	0.9	4	1.5	4.5	1	0	0	0	0	0	0	1
15	0.51428571	0.9	2	1.5	4.5	1	0	0	0	1	0	0	0
16	20	16	8	63	190	1	0	0	0	1	0	0	0
17	3.00006	3.00006	5	5.0001	15.0003	1	0	0	0	1	0	0	0
18	31	120	0	124	354	0	0	0	0	0	1	0	0
19	3	3	2	11	33	0	0	0	1	0	0	0	1
20	3	3	10	11	33	0	0	0	1	0	0	0	1
21	7	5	3	26	79	0	0	0	0	1	0	0	0
22	1.0285714	1.8	2	3	9	0	0	0	0	1	0	0	0
23	6	6	5	19	56	0	0	0	0	1	0	0	0
24	9	12	2	34	102	0	0	0	0	1	0	0	0
25	25	55	4	137	411	0	0	0	0	1	0	0	0
26	28	36	2	148	443	0	0	0	0	1	0	0	0
27	3	3	6	12	36	0	0	0	0	0	0	1	0
28	3	3	6	12	36	0	0	0	0	0	0	1	0
29	16	21	7	52	157	0	0	0	0	1	0	0	0
30	40	41	5	139	418	0	0	0	1	1	0	0	0
31	16	14	15	50	149	0	0	0	1	1	0	0	0
32	7	2	3	19	57	0	0	0	0	1	0	0	0
33	38	43	8	141	424	1	0	0	1	1	0	0	0
34	11	9	10	38	114	1	0	0	1	1	0	0	0
35	9	8	3	29	88	0	0	0	0	1	0	0	0
36	8	8	3	29	88	0	0	0	0	1	0	0	0
37	30	35	3	104	308	1	0	0	0	0	1	0	0
38	0.6	0.6	5	1	3	1	0	0	0	0	0	0	1
39	35	57	2	136	408	0	0	0	0	1	0	0	0
40	35	24	7	78	233	1	0	0	1	0	1	0	0
41	6	3	65	11	33	1	0	0	1	0	1	0	0
42	30	72	2	169	506	0	1	1	0	0	1	0	0
43	34	46	8	159	471	0	0	0	0	1	0	0	0
44	7	8	2	33	100	0	0	0	0	0	0	1	0
45	4	3	14	8	24	1	0	0	0	1	0	0	0
46	16	39	2	71	209	0	0	0	0	1	0	0	0
47	11	22	2	33	100	1	0	0	1	1	0	0	0
48	26	48	1	131	392	0	0	0	0	1	0	0	0
49	11	8	3	43	129	1	0	0	0	1	0	0	0
50	4	12	5	14	42	1	0	0	0	1	0	0	0
51	24	28	3	100	301	0	0	0	0	1	0	0	0
52	8	7	2	34	101	0	0	0	0	1	0	0	0
53	8	10	4	33	100	0	0	1	0	0	0	1	0
54	8	10	2	33	100	0	0	1	0	0	0	1	0
55	34	44	7	108	304	0	0	0	0	1	0	0	0
56	5	30	1	20	61	0	0	0	0	1	0	0	0
57	22	29	5	95	285	1	0	0	0	1	0	0	0
58	7	9	3	31	92	1	1	0	0	0	1	0	0
59	27	52	3	95	284	1	0	0	0	1	0	0	0
60	8	21	4	25	74	0	0	0	0	1	0	0	0
61	17	62	1	60	175	0	0	0	0	1	0	0	0
62	9	16	4	40	118	0	0	0	0	1	0	0	0
63	7	21	5	25	74	0	0	0	0	1	0	0	0
64	9	16	4	40	118	0	0	0	0	1	0	0	0
65	10	10	11	24	73	0	0	0	0	1	0	0	0
66	1.59996	2.39994	3	3.9999	11.9997	1	0	0	0	0	0	0	1
67	1.59996	2.39994	5	3.9999	11.9997	1	0	0	0	0	0	0	1
68	30	23	8	107	322	1	0	0	0	1	0	0	0
69	5	11	21	12	36	1	0	0	0	0	0	0	1
70	17	22	2	60	179	0	1	0	1	0	1	0	0
71	0.45	0.45	5	0.75	2.25	0	1	0	1	0	0	0	1
72	0.75006	0.75006	6	1.2501	3.7503	0	0	0	0	0	0	0	1
73	6	2	2	24	72	0	0	0	0	1	0	0	0
74	1.08	1.35	4	2.25	6.75	0	0	0	0	1	0	0	0
75	6	2	2	24	72	0	0	0	0	0	0	0	1
76	1.08	1.35	4	2.25	6.75	0	0	0	0	0	0	0	1
77	1.199952	1.49994	4	2.4999	7.4997	0	0	0	0	0	0	0	1
78	7	20	7	22	66	0	0	0	0	1	0	0	0
79	30	36	2	166	497	0	0	0	1	1	0	0	0
80	7	13	5	24	73	0	0	0	1	1	0	0	0
81	1	1	2	3	8	0	0	0	0	0	0	1	0
82	18	27	6	95	277	1	0	0	0	1	0	0	0
83	0.45	0.45	5	0.75	2.25	1	0	0	0	1	0	0	0
84	20	14	4	107	320	1	0	0	0	1	0	0	0
85	3	4	8	6	18	1	0	0	0	1	0	0	0
86	36	40	4	118	354	1	0	0	0	1	0	0	0
87	17	26	7	52	157	1	1	0	0	0	1	0	0
88	1.40004	2.10006	3	3.5001	10.5003	1	0	0	0	0	0	1	0
89	31	38	3	137	412	1	0	0	1	1	0	0	0
90	11	33	4	55	166	1	0	0	1	1	0	0	0
91	23	28	1	104	312	0	0	1	0	1	0	0	0
92	15	22	2	56	169	0	0	0	0	0	0	1	0
93	11	5	15	23	65	0	0	0	1	1	0	0	0
94	8	23	3	30	89	0	0	0	0	1	0	0	0
95	18	34	2	64	193	0	0	0	0	0	1	0	0
96	18	18	5	64	193	0	0	0	0	0	0	0	1
97	32	25	4	141	423	1	0	0	0	0	1	0	0
98	4	2	15	7	21	1	0	0	0	0	0	0	1
99	3	9	1	8	23	1	1	0	0	1	0	0	0
100	20	31	4	105	310	0	1	0	0	1	0	0	0
101	27	34	3	88	265	1	0	0	0	1	0	0	0
102	23	31	1	82	245	1	0	0	0	0	0	0	1
103	23	28	1	82	245	1	0	0	0	1	0	0	0
104	23	28	1	82	245	1	0	0	0	0	0	0	1
105	2	3	2	7	20	1	0	0	0	1	0	0	0
106	10	20	4	38	115	0	0	0	0	1	0	0	0
107	9	20	3	38	115	0	0	0	0	1	0	0	0
108	12	14	5	34	101	0	0	0	0	1	0	0	0
109	12	7	5	41	123	0	0	0	0	1	0	0	0
110	12	16.88333	6	41	123	0	0	0	0	1	0	0	0
111	35	51	4	125	374	0	0	0	1	1	0	0	0
112	0.6	0.6	5	1	3	0	0	0	1	0	0	0	1
113	8	3	4	31	94	1	0	0	0	0	0	0	1
114	2.10006	2.10006	5	3.5001	10.5003	1	0	0	0	0	0	0	1
115	18	25	4	65	194	1	1	0	0	1	0	0	0
116	16	27	4	56	169	0	0	0	0	1	0	0	0
117	2.00004	3.00006	3	5.0001	15.0003	0	0	0	0	0	0	0	1
118	0.94285714	1.65	2	2.75	8.25	0	0	0	1	0	0	0	1
119	0.94285714	1.65	4	2.75	8.25	0	0	0	1	1	0	0	0
120	0.94285714	1.65	2	2.75	8.25	0	0	0	1	1	0	0	0
121	13	21	4	43	128	0	0	0	1	1	0	0	0
122	0.94285714	1.65	2	2.75	8.25	0	0	0	1	1	0	0	0
123	2	1	2	6	17	0	0	0	1	0	0	0	1
124	3	41	1	11	33	0	0	0	1	1	0	0	0
125	0.94285714	1.65	2	2.75	8.25	0	0	0	1	1	0	0	0
126	8	16	2	31	94	1	0	0	0	1	0	0	0
127	2	2	9	4	14	0	0	0	0	0	0	0	1
128	2	2	10	4	14	0	0	0	0	0	0	0	1
129	23	32	4	83	248	0	0	0	1	0	1	0	0
130	2.4	1.8	6	3	9	0	0	0	1	0	0	0	1
131	18	31	3	78	233	0	0	0	0	1	0	0	0
132	37	41	8	154	461	0	0	0	0	1	0	0	0
133	11	18	12	26	79	1	1	0	0	0	1	0	0
134	15	15	10	26	76	1	1	0	0	1	0	0	0
135	20	18	3	63	178	0	0	0	0	1	0	0	0
136	20	18	1	66	188	0	0	0	0	1	0	0	0
137	17	24	5	77	232	0	0	0	0	0	1	0	0
138	0.6	0.45	8	0.75	2.25	0	0	0	1	0	0	1	0
139	2	2	5	4	11	0	0	0	1	0	0	1	0
140	2	2	1	4	11	0	0	0	1	1	0	0	0
141	6	17	3	21	64	0	0	0	0	1	0	0	0
142	2	3	2	7	20	1	1	1	0	1	0	0	0
143	3	3	2	7	22	1	0	0	0	1	0	0	0
144	0.479952	0.59994	4	0.9999	2.9997	1	0	0	0	0	0	0	1
145	3	3	2	7	22	1	0	0	0	0	0	0	1
146	0.479952	0.59994	4	0.9999	2.9997	1	0	0	0	0	0	0	1
147	0.59994	0.59994	6	0.9999	2.9997	1	0	0	0	0	0	0	1
148	4	3	2	13	38	0	1	0	0	0	0	1	0
149	38	55	5	184	550	0	0	0	0	1	0	0	0
150	3	1	12	9	27	0	0	0	0	1	0	0	0
151	0.99996	1.49994	5	2.4999	7.4997	1	0	0	0	0	0	1	0
152	7	6	20	15	44	0	0	0	0	1	0	0	0
153	8	16	6	23	70	0	0	0	0	1	0	0	0
154	4	3	16	12	25	1	0	0	0	1	0	0	0
155	5	1	8	13	14	1	0	0	0	0	0	1	0
156	9	17	3	42	125	0	0	0	0	1	0	0	0
157	3	3	1	7	21	0	0	0	0	0	0	0	1
158	13	19	4	58	174	0	0	0	1	1	0	0	0
159	13	19	6	58	174	0	0	0	1	1	0	0	0
160	5	2	18	13	38	1	0	0	0	0	0	1	0
161	22	35	3	84	252	1	0	0	0	0	1	0	0
162	4	2	15	7	21	1	0	0	0	0	0	0	1
163	11	13	2	36	107	1	1	0	0	1	0	0	0
164	2	2	5	5	16	1	1	0	0	0	0	0	1
165	19	44	3	60	175	1	0	0	0	1	0	0	0
166	24	29	2	90	269	1	1	0	0	1	0	0	0
167	10	17	5	40	120	0	0	1	0	1	0	0	0
168	7	7	5	17	52	0	0	1	0	1	0	0	0
169	3	0	2	11	34	0	0	1	0	1	0	0	0
170	4	2	3	14	42	1	0	0	0	1	0	0	0
171	33	65	1	190	571	0	0	0	0	1	0	0	0
172	6	8	11	9	28	1	0	0	1	1	0	0	0
173	16	21	8	33	98	0	0	0	0	1	0	0	0
174	19	32	1	69	206	1	0	0	0	1	0	0	0
175	4	2	2	17	51	1	0	0	0	1	0	0	0
176	5	15	3	22	65	1	0	0	0	1	0	0	0
177	5	18	3	22	65	1	0	0	0	1	0	0	0
178	8	13	2	36	109	1	0	0	0	1	0	0	0
179	19	41	3	80	238	1	0	0	0	1	0	0	0
180	24	24	3	87	262	0	0	0	0	1	0	0	0
181	0.3	0.3	5	0.5	1.5	0	0	0	0	0	0	0	1
182	40	72	5	206	618	0	0	0	0	1	0	0	0
183	3	4	5	9	28	0	0	0	0	0	0	1	0
184	18	18	5	65	194	0	0	1	0	1	0	0	0
185	4	4	11	9	23	1	1	0	0	0	0	1	0
186	4	4	8	9	28	1	1	0	0	0	0	1	0
187	7	8	7	21	63	1	0	1	0	0	1	0	0
188	9	9	2	37	112	1	0	0	1	1	0	0	0
189	1.40004	2.10006	3	3.5001	10.5003	1	0	0	1	0	0	0	1
190	9	15	3	31	94	0	0	0	0	1	0	0	0
191	5	7	9	15	44	0	0	0	0	1	0	0	0
192	8	7	8	23	70	0	0	0	0	1	0	0	0
193	0.6	0.6	5	1	3	0	0	0	0	1	0	0	0
194	5	9	15	9	27	0	0	0	0	1	0	0	0
195	0.75006	0.75006	5	1.2501	3.7503	0	0	0	0	1	0	0	0
196	6	16	1	21	64	0	0	1	0	1	0	0	0
197	5	7	3	20	60	0	0	1	0	1	0	0	0
198	11	24	8	45	135	1	0	0	1	1	0	0	0
199	8	11	2	23	67	1	0	0	0	1	0	0	0
200	7	11	2	23	67	1	0	0	0	1	0	0	0
201	20	23	5	111	332	1	0	0	0	0	1	0	0
202	17	37	3	62	185	1	0	0	1	1	0	0	0
203	17	31	6	70	209	0	0	0	0	0	1	0	0
204	0.99996	1.49994	3	2.4999	7.4997	0	0	0	0	0	0	1	0
205	0.99996	1.49994	3	2.4999	7.4997	0	0	0	0	0	0	1	0
206	11	12	7	34	99	1	0	0	0	0	1	0	0
207	7	12	10	19	57	1	0	0	0	1	0	0	0
208	8	6	13	24	73	1	0	0	0	1	0	0	0
209	7	3	65	11	34	0	0	0	0	1	0	0	0
210	3	5	8	8	24	0	1	0	0	0	0	1	0
211	0.6	0.9	3	1.5	4.5	0	1	0	0	0	0	1	0
212	15	25	4	50	150	0	0	0	0	1	0	0	0
213	15	25	2	50	150	0	0	0	0	1	0	0	0
214	1.2	1.8	5	3	9	0	0	1	0	1	0	0	0
215	2	2	3	6	17	0	0	1	0	1	0	0	0
216	14	27	1	110	329	0	0	0	0	1	0	0	0
217	13	15	2	45	134	0	0	0	0	1	0	0	0
218	12	16	3	45	134	0	0	0	0	1	0	0	0
219	5	4	2	22	65	0	0	0	0	1	0	0	0
220	23	37	3	89	268	0	0	0	0	1	0	0	0
221	35	69	1	215	645	0	0	0	0	1	0	0	0
222	6	6	4	23	68	0	0	0	0	1	0	0	0
223	6	6	2	23	68	0	0	0	0	1	0	0	0
224	11	11	4	37	112	0	0	0	0	1	0	0	0
225	18	22	3	59	177	0	0	0	0	1	0	0	0
226	17	29	3	72	215	0	0	0	0	1	0	0	0
227	23	24	6	131	392	0	0	0	0	1	0	0	0
228	24	24	8	134	402	0	0	0	0	1	0	0	0
229	5	6	7	10	30	0	0	0	0	0	0	1	0
230	5	6	6	20	61	0	1	0	0	0	1	0	0
231	11	16	3	44	131	0	0	0	0	1	0	0	0
232	11	16	3	44	131	0	0	0	0	1	0	0	0
233	25	25	5	121	362	1	0	0	0	0	1	0	0
234	39	34	6	223	670	1	0	0	0	1	0	0	0
235	0.51428571	0.9	2	1.5	4.5	1	0	1	0	0	0	0	1
236	18	14	3	54	161	1	0	0	0	1	0	0	0
237	6	3	5	21	63	0	0	0	0	1	0	0	0
238	7	17	3	26	77	0	0	0	0	1	0	0	0
239	3	4	28	5	15	0	0	0	0	0	0	1	0
240	3	2	5	7	21	0	0	0	0	0	0	1	0
241	19	120	0	69	207	1	1	0	0	1	0	0	0
242	6	9	6	20	61	1	0	0	0	0	1	0	0
243	6	9	6	20	61	1	0	0	0	0	1	0	0
244	13	15	11	54	161	0	0	0	0	1	0	0	0
245	8	36.5	2	30	89	0	1	0	0	1	0	0	0
246	4	4	8	12	36	1	1	0	0	0	1	0	0
247	13	9	1	49	147	0	0	0	1	0	1	0	0
248	4	2	15	7	21	0	0	0	1	0	0	0	1
249	16	14	1	57	171	0	0	0	1	0	1	0	0
250	1.8	1.8	6	3	9	0	0	0	1	1	0	0	0
251	1.2	1.8	5	3	9	1	0	1	0	1	0	0	0
252	0.80004	1.20006	5	2.0001	6.0003	0	0	0	0	1	0	0	0
253	2	1	2	5	16	0	0	0	0	1	0	0	0
254	9	10	4	30	90	1	0	0	0	1	0	0	0
255	13	23	11	31	94	1	0	0	0	0	1	0	0
256	3	2	2	8	25	0	1	0	0	1	0	0	0
257	5	3	17	9	27	1	0	0	0	0	0	0	1
258	7	8	11	24	71	1	0	0	0	0	1	0	0
259	8	11	15	27	82	1	0	0	0	0	1	0	0
260	16	19	11	44	131	1	0	0	0	1	0	0	0
261	0.59994	0.59994	5	0.9999	2.9997	1	0	0	0	0	0	0	1
262	15	11	5	41	123	1	1	0	0	1	0	0	0
263	50	49	5	261	784	0	0	0	0	1	0	0	0
264	2.88	3.6	4	6	18	0	0	0	0	1	0	0	0
265	2.88	3.6	4	6	18	0	0	0	0	1	0	0	0
266	26	26	1	94	282	0	0	0	1	0	1	0	0
267	2.7	2.7	5	4.5	13.5	0	0	0	1	0	0	0	1
268	4	3	8	10	26	1	1	0	0	1	0	0	0
269	43	51	6	132	395	0	0	0	1	1	0	0	0
270	8	9	12	14	42	1	0	1	0	0	1	0	0
271	8	13	9	19	56	1	0	1	0	0	1	0	0
272	9	11	1	38	115	1	0	0	0	1	0	0	0
273	12	14	3	46	137	1	0	1	0	1	0	0	0
274	13	22	2	49	147	1	0	1	0	1	0	0	0
275	9	10	25	13	39	1	0	0	0	0	0	0	1
276	8	10	26	13	39	1	0	0	0	0	0	0	1
277	4	3	7	11	33	0	0	0	0	1	0	0	0
278	6	3	8	13	39	0	0	0	0	1	0	0	0
279	6	4.5	6	7.5	22.5	0	0	0	1	0	0	0	1
280	3.90006	3.90006	5	6.5001	19.5003	0	0	0	0	1	0	0	0
281	3.90006	3.90006	5	6.5001	19.5003	0	0	0	0	1	0	0	0
282	23	24	38	35	104	1	1	0	0	0	1	0	0
283	12	10	5	47	142	0	0	0	0	1	0	0	0
284	2.16	2.7	4	4.5	13.5	0	0	0	0	1	0	0	0
285	27	17	15	50	150	0	0	0	0	1	0	0	0
286	2.7	2.7	6	4.5	13.5	1	0	0	0	0	0	0	1
287	11	14	26	22	62	0	0	0	0	0	0	0	1
288	10	12	21	18	53	0	0	0	0	0	1	0	0
289	19	6	7	42	126	0	0	0	0	1	0	0	0
290	2.80008	2.10006	6	3.5001	10.5003	1	1	0	0	0	0	0	1
291	4.39992	3.29994	6	5.4999	16.4997	0	0	0	0	0	0	0	1
292	15	12	21	26	79	1	0	0	0	0	1	0	0
293	26	33	2	86	258	0	0	0	1	1	0	0	0
294	17	14	5	57	172	0	0	0	1	1	0	0	0
295	20	12	6	80	241	0	0	0	0	1	0	0	0
296	13	5	44	30	89	0	0	0	0	0	0	0	1
297	12	9	24	18	55	1	0	0	0	0	1	0	0
298	12	17	15	38	116	1	0	0	0	1	0	0	0
299	10	7	27	20	62	1	0	0	0	1	0	0	0
300	4.00008	3.00006	8	5.0001	15.0003	0	0	1	0	0	0	0	1
301	3.00006	3.00006	5	5.0001	15.0003	0	0	1	0	0	0	1	0
302	17	17	7	39	116	1	0	0	0	1	0	0	0
303	18	17	5	39	116	1	0	0	0	1	0	0	0
304	18	26	10	53	158	1	0	0	0	0	1	0	0
305	16	17	19	23	68	0	0	0	1	0	1	0	0
306	2.4	1.8	6	3	9	0	0	0	1	0	0	0	1
307	2.4	1.8	6	3	9	1	0	0	1	0	0	0	1
308	32	22	13	52	155	0	0	0	0	1	0	0	0
309	18	20	12	35	105	0	0	0	1	1	0	0	0
310	2.4	1.8	6	3	9	0	0	0	1	0	0	0	1
311	15	18	6	36	110	0	0	1	0	0	1	0	0
312	4.20012	2.10006	10	3.5001	10.5003	0	0	0	1	0	0	0	1
313	2.80008	2.10006	6	3.5001	10.5003	0	0	0	1	0	0	0	1
314	31	34	16	53	159	1	0	1	0	0	1	0	0
315	4.20012	2.10006	10	3.5001	10.5003	1	0	0	0	1	0	0	0
316	13	18	12	39	118	1	0	0	0	1	0	0	0
317	9	7	47	21	62	1	0	0	1	0	0	0	1
318	7	12	3	24	72	1	0	0	0	1	0	0	0
319	16	23	6	42	128	0	0	0	0	1	0	0	0
320	25	37	2	123	369	0	0	0	0	1	0	0	0
321	28	28	8	113	338	0	0	0	0	1	0	0	0
322	33	36	8	142	425	0	0	0	0	1	0	0	0
323	29	26	20	39	117	0	0	0	1	0	0	1	0
324	4.00008	3.00006	6	5.0001	15.0003	0	0	0	1	0	0	0	1
325	24	31	13	43	129	1	0	0	0	1	0	0	0
326	16	18	17	31	92	0	0	0	0	1	0	0	0
327	26	120	0	114	342	0	0	0	0	1	0	0	0
328	8	9	8	23	69	0	0	0	0	1	0	0	0
329	1.8	2.7	3	4.5	13.5	0	0	0	0	1	0	0	0
330	17	32	5	58	172	0	0	0	0	1	0	0	0
331	2.60004	3.90006	5	6.5001	19.5003	0	0	0	0	1	0	0	0
332	6	3	5	10	31	0	0	0	0	0	0	0	1
333	4.20012	2.10006	10	3.5001	10.5003	0	0	0	0	0	1	0	0
334	37	36	5	216	648	0	0	0	0	0	1	0	0
335	37	29	7	99	297	0	0	0	0	1	0	0	0
336	29	34	7	99	297	0	0	0	0	1	0	0	0
337	23	13	19	43	107	0	0	0	0	0	0	0	1
338	0.99996	1.49994	3	2.4999	7.4997	1	0	0	1	1	0	0	0
339	2.60004	3.90006	3	6.5001	19.5003	1	0	0	1	1	0	0	0
340	5	6	5	12	38	1	0	0	1	1	0	0	0
341	30	32	2	105	315	0	0	0	0	1	0	0	0
342	30	28	2	105	315	0	0	0	0	1	0	0	0
343	32	22	6	75	225	1	0	0	0	0	1	0	0
344	18	26	22	43	128	0	0	0	0	1	0	0	0
345	29	26	17	43	128	0	0	0	0	1	0	0	0
346	21	18	29	49	146	0	0	0	0	0	0	0	1
347	45	64	1	181	543	0	0	0	1	1	0	0	0
348	24	16	16	36	107	1	0	0	0	0	1	0	0
349	5.20008	3.90006	8	6.5001	19.5003	1	0	0	0	0	0	0	1
350	3.90006	3.90006	5	6.5001	19.5003	1	0	0	0	0	0	0	1
351	4.079952	5.09994	4	8.4999	25.4997	1	0	0	0	1	0	0	0
352	6.00012	3.00006	10	5.0001	15.0003	0	0	0	1	1	0	0	0
353	4.00008	3.00006	6	5.0001	15.0003	0	0	0	1	1	0	0	0
354	19	20	14	50	150	1	0	0	1	1	0	0	0
355	4.79988	2.39994	10	3.9999	11.9997	1	0	0	0	0	0	0	1
356	6	7	21	11	34	1	0	0	0	0	0	0	1
357	6	7	21	11	34	1	0	0	0	0	0	0	1
358	25	11	17	49	147	0	0	0	0	1	0	0	0
359	15	11	10	49	147	0	0	0	0	1	0	0	0
360	6.00012	3.00006	10	5.0001	15.0003	0	0	0	1	1	0	0	0
361	12	27	22	34	101	0	0	0	1	1	0	0	0
362	15	19	21	35	105	0	0	0	1	1	0	0	0
363	8	23	21	26	78	0	0	0	1	1	0	0	0
364	4.00008	3.00006	6	5.0001	15.0003	0	0	0	1	1	0	0	0
365	12	22	22	34	102	0	0	0	1	1	0	0	0
366	27	31	16	54	155	0	1	0	0	0	1	0	0
367	4	0	7	8	24	1	0	0	0	1	0	0	0
368	4	3	1	14	42	1	0	0	0	1	0	0	0
369	29	23	7	75	224	1	0	0	0	0	1	0	0
370	2.4	1.8	6	3	9	1	0	0	0	0	0	0	1
371	23	24	38	35	104	1	0	0	0	1	0	0	0
372	11	10	17	12	38	1	0	0	0	0	1	0	0
373	7	5	64	13	38	1	0	0	0	0	0	0	1
374	19	15	17	33	79	0	0	0	0	0	0	0	1
375	13	18	22	30	86	0	0	0	1	0	1	0	0
376	46	26	4	92	277	0	0	0	0	0	1	0	0
377	29	21	4	89	267	1	0	0	0	1	0	0	0
378	7.80012	3.90006	10	6.5001	19.5003	1	0	0	0	0	0	0	1
379	5.20008	3.90006	6	6.5001	19.5003	1	0	0	0	0	0	0	1
380	31	22	10	71	212	0	0	0	0	0	1	0	0
381	2.4	1.8	6	3	9	0	0	0	0	1	0	0	0
382	11	8	9	38	114	0	0	0	0	1	0	0	0
383	18	9	8	38	114	0	0	0	0	1	0	0	0
384	7	22	4	28	85	1	0	0	0	1	0	0	0
385	7	10	5	21	64	1	0	0	0	1	0	0	0
386	13	18	19	41	124	0	0	0	1	1	0	0	0
387	5	8	21	10	31	0	0	0	0	0	1	0	0
388	16	21	21	36	108	1	0	0	0	0	1	0	0
389	6	3	22	12	36	1	0	0	0	0	0	0	1
390	18	12	22	25	76	0	0	1	0	0	1	0	0
391	9	6	14	25	75	1	0	0	0	0	1	0	0
392	13	12	30	23	68	0	0	0	0	1	0	0	0
393	17	14	10	43	129	0	0	0	0	1	0	0	0
394	14	18	9	36	108	1	0	0	0	0	1	0	0
395	15	17	12	36	107	0	0	0	1	1	0	0	0
396	26	25	31	43	129	0	0	0	0	0	1	0	0
397	6	7	43	10	28	0	0	0	0	0	0	0	1
398	6	7	42	10	28	0	0	0	0	0	0	0	1
399	20	11	13	53	160	1	0	0	0	0	1	0	0
400	16	11	15	53	160	1	0	0	0	0	0	0	1
401	10	8	9	18	52	0	0	0	0	1	0	0	0
402	10	8	26	18	52	0	0	0	0	1	0	0	0
403	4.560048	5.70006	4	9.5001	28.5003	1	0	0	1	1	0	0	0
404	4.560048	5.70006	4	9.5001	28.5003	1	0	0	1	1	0	0	0
405	20	17	18	27	82	1	0	0	0	0	1	0	0
406	14	11	11	55	164	1	0	0	0	1	0	0	0
407	6	12	11	13	39	1	0	0	0	0	1	0	0
408	26	29	10	96	288	0	0	0	0	0	1	0	0
409	12	9	24	18	55	1	0	0	0	0	1	0	0
410	2.4	1.8	6	3	9	1	0	0	0	0	0	0	1
411	18	23	23	42	126	1	0	1	0	0	0	1	0
412	6	6	22	12	35	1	0	1	0	0	0	1	0
413	12	15	7	22	61	1	0	1	0	0	0	1	0
414	23	13	12	56	168	1	0	0	0	1	0	0	0
415	36	21	6	127	380	0	0	0	1	1	0	0	0
416	2.4	1.8	6	3	9	0	0	0	1	0	0	0	1
417	31	46	1	98	294	1	0	0	0	1	0	0	0
418	37	51	3	148	428	1	0	0	0	1	0	0	0
419	12	3	52	11	34	1	0	0	1	0	0	0	1
420	6	4	48	14	41	1	0	0	1	0	0	0	1
421	1.8	2.7	3	4.5	13.5	1	1	0	0	0	0	0	1
422	16	11	17	50	149	0	0	0	0	1	0	0	0
423	8	5	63	13	39	0	0	0	0	0	0	0	1
424	7	7	8	18	53	0	1	0	0	0	1	0	0
425	43	32	5	132	382	1	0	0	0	0	1	0	0
426	21	14	13	54	161	0	1	0	0	0	1	0	0
427	24	13	17	23	68	1	0	0	0	1	0	0	0
428	2.80008	2.10006	6	3.5001	10.5003	1	0	0	0	0	0	0	1
429	19	20	4	78	235	1	0	0	0	1	0	0	0
430	2.88	3.6	4	6	18	1	0	0	0	0	0	0	1
431	3.90006	3.90006	6	6.5001	19.5003	1	0	0	0	0	0	0	1
432	3.120048	3.90006	4	6.5001	19.5003	1	0	0	0	0	0	0	1
433	13	12	17	17	52	1	0	0	0	0	1	0	0
434	12	10	5	44	133	1	0	0	0	1	0	0	0
435	11	8	4	30	89	0	1	0	0	1	0	0	0
436	1.94994	1.94994	5	3.2499	9.7497	0	1	0	0	0	0	0	1
437	34	34	5	107	320	1	0	0	1	0	1	0	0
438	3.359952	4.19994	4	6.9999	20.9997	1	0	0	1	0	0	0	1
439	17	15	8	27	80	0	0	0	0	0	1	0	0
440	13	12	32	29	88	0	0	0	0	0	0	0	1
441	15	11	17	20	62	0	0	0	0	0	1	0	0
442	47	40	4	110	330	0	0	0	0	1	0	0	0
443	10	6	3	33	98	0	0	0	0	1	0	0	0
444	35	28	8	73	219	0	0	0	0	1	0	0	0
445	20	13	7	51	152	0	0	0	1	1	0	0	0
446	14	18	3	49	148	0	0	0	0	1	0	0	0
447	1.680048	2.10006	4	3.5001	10.5003	0	0	0	0	0	0	0	1
448	25	19	17	33	99	0	0	0	0	0	0	1	0
449	23	43	2	121	364	0	0	0	0	1	0	0	0
450	12	7	4	44	133	0	0	0	0	1	0	0	0
451	0.99996	1.49994	3	2.4999	7.4997	0	0	0	0	0	0	0	1
452	12	8	17	18	54	0	0	0	0	0	0	0	1
453	9	12	5	42	126	0	0	0	0	1	0	0	0
454	14	11	17	18	53	0	0	0	0	1	0	0	0
455	5.70006	5.70006	6	9.5001	28.5003	1	0	0	0	0	0	0	1
456	25	11	4	38	114	1	0	0	0	1	0	0	0
457	2.4	1.8	6	3	9	1	0	0	0	0	0	0	1
458	24	21	13	45	134	1	0	1	0	0	1	0	0
459	6	6	22	12	35	0	0	0	0	0	1	0	0
460	5.20008	3.90006	6	6.5001	19.5003	0	0	0	0	0	0	0	1
461	11	16	21	23	70	0	0	1	0	0	0	1	0
462	2.80008	2.10006	6	3.5001	10.5003	0	0	1	0	0	0	0	1
463	18	14	6	62	185	1	0	0	0	1	0	0	0
464	0.80004	1.20006	5	2.0001	6.0003	1	0	0	0	1	0	0	0
465	26	26	13	57	172	0	1	0	0	0	1	0	0
466	2.80008	2.10006	6	3.5001	10.5003	0	1	0	0	0	0	0	1
467	16	23	6	37	111	0	0	0	0	1	0	0	0
468	25	10	17	26	77	1	0	0	1	0	1	0	0
469	19	15	18	22	64	1	0	0	0	0	1	0	0
470	1.99992	1.49994	6	2.4999	7.4997	1	0	0	0	0	0	0	1
471	5.10012	2.55006	10	4.2501	12.7503	1	0	0	0	0	1	0	0
472	19	15	17	33	79	0	0	0	0	1	0	0	0
473	22	14	11	79	236	0	0	0	1	1	0	0	0
474	17	16	17	33	98	1	0	0	0	0	1	0	0
475	3.00006	3.00006	5	5.0001	15.0003	1	0	0	0	1	0	0	0
476	8	8	43	16	47	0	0	0	0	1	0	0	0
477	19	7	12	37	111	0	0	0	0	1	0	0	0
478	2.16	2.7	4	4.5	13.5	0	0	0	0	1	0	0	0
479	26	21	2	86	258	0	0	0	0	1	0	0	0
480	23	22	16	37	111	0	0	0	0	1	0	0	0
481	21	6	35	30	89	1	0	0	0	0	1	0	0
482	4	6	21	6	18	1	0	0	0	0	0	0	1
483	1.3713943	2.39994	4	3.9999	11.9997	0	0	0	0	0	0	1	0
484	1.3713943	2.39994	2	3.9999	11.9997	0	0	0	0	0	0	1	0
485	11	16	7	46	138	0	1	0	0	1	0	0	0
486	13	6	38	30	89	0	1	0	0	0	0	0	1
487	5.09994	5.09994	6	8.4999	25.4997	0	1	0	0	0	0	0	1
488	4.079952	5.09994	4	8.4999	25.4997	0	1	0	0	0	0	0	1
489	26	21	18	40	121	1	0	0	1	1	0	0	0
490	6	4	21	10	31	1	0	0	1	0	0	0	1
491	23	25	3	102	305	0	0	0	0	1	0	0	0
492	30	61	3	148	436	0	0	0	0	1	0	0	0
493	19	24	17	56	167	0	1	0	0	1	0	0	0
494	17	25	12	36	109	0	1	0	0	1	0	0	0
495	21	22	19	40	97	0	0	0	0	0	1	0	0
496	16	31	6	39	116	1	0	0	0	1	0	0	0
497	24	13	17	23	68	1	0	0	0	0	1	0	0
498	2.80008	2.10006	6	3.5001	10.5003	1	0	0	0	1	0	0	0
499	12	15	21	22	61	1	0	0	0	1	0	0	0
500	23	16	18	34	103	0	0	0	0	0	0	1	0
501	3.19992	2.39994	6	3.9999	11.9997	0	0	0	0	0	0	0	1
502	26	40	2	106	318	0	0	0	1	1	0	0	0
503	38	35	9	111	332	0	0	0	1	1	0	0	0
504	33	22	10	66	199	0	0	0	0	1	0	0	0
505	29	15	11	62	185	0	1	0	0	0	1	0	0
506	15	25	35	37	111	0	1	0	0	0	0	0	1
507	17	12	6	40	121	0	0	0	0	1	0	0	0
508	17	20	3	83	246	0	1	0	0	1	0	0	0
509	18	18	7	84	248	0	1	0	0	1	0	0	0
510	12	7	8	43	130	1	0	0	0	1	0	0	0
511	11	8	17	15	46	1	0	0	0	1	0	0	0
512	32	36	2	81	243	0	0	0	0	0	1	0	0
513	4.39992	3.29994	6	5.4999	16.4997	0	0	0	0	1	0	0	0
514	4.39992	3.29994	6	5.4999	16.4997	0	0	0	0	1	0	0	0
515	4.20012	2.10006	10	3.5001	10.5003	0	0	0	0	0	0	0	1
516	15	8	5	55	165	0	0	0	0	1	0	0	0
517	6	12	2	24	70	0	0	0	0	1	0	0	0
518	20	14	17	22	61	0	0	0	0	0	1	0	0
519	27	23	9	73	220	0	0	0	1	1	0	0	0
520	15	17	6	46	137	0	0	0	1	1	0	0	0
521	29	42	3	114	341	0	0	0	0	1	0	0	0
522	0.72	0.9	4	1.5	4.5	0	0	0	0	0	0	0	1
523	5.4	2.7	10	4.5	13.5	0	0	0	0	1	0	0	0
524	3.6	2.7	6	4.5	13.5	0	0	0	0	1	0	0	0
525	29	20	10	60	180	0	0	0	0	0	1	0	0
526	2.16	2.7	4	4.5	13.5	0	0	0	0	0	0	0	1
527	15	15	4	39	118	1	0	0	0	1	0	0	0
528	19	19	13	53	160	1	0	0	0	1	0	0	0
529	4.20012	2.10006	10	3.5001	10.5003	0	0	0	0	0	0	0	1
530	11	9	21	22	67	0	0	0	0	0	0	0	1
531	1.919952	2.39994	4	3.9999	11.9997	1	0	0	0	0	0	1	0
532	10	16	7	24	73	0	0	0	0	1	0	0	0
533	3.19992	2.39994	6	3.9999	11.9997	0	0	0	0	1	0	0	0
534	1.5	2.25	5	3.75	11.25	1	0	0	0	0	0	0	1
535	1.5	2.25	3	3.75	11.25	1	0	0	0	0	0	0	1
536	9	12	21	18	55	1	0	0	1	0	1	0	0
537	5	7	42	8	23	1	0	0	1	0	0	0	1
538	22	25	13	43	110	0	0	0	0	1	0	0	0
539	11	18	24	23	68	0	0	0	0	0	0	0	1
540	12	9	11	40	120	0	0	0	0	1	0	0	0
541	11	9	8	40	120	0	0	0	0	1	0	0	0
542	4.19994	4.19994	6	6.9999	20.9997	0	0	1	0	1	0	0	0
543	6	3	3	22	67	0	0	0	0	0	1	0	0
544	10	4	6	37	112	1	0	0	0	1	0	0	0
545	19	4	9	36	106	0	0	0	0	1	0	0	0
546	11	4	9	36	106	0	0	0	0	1	0	0	0
547	19	13	18	29	88	0	0	0	0	1	0	0	0
548	5	11	22	8	25	1	0	0	1	0	1	0	0
549	6	10	22	14	42	1	0	0	1	0	0	0	1
550	25	29	4	86	257	0	0	0	1	1	0	0	0
551	10	7	5	44	133	0	0	0	1	1	0	0	0
552	17	21	23	38	114	0	0	0	0	0	1	0	0
553	3.19992	2.39994	6	3.9999	11.9997	0	0	0	1	1	0	0	0
554	21	16	17	28	83	0	1	0	1	0	1	0	0
555	20	23	5	73	219	1	1	0	0	0	0	0	1
556	1.2	1.8	5	3	9	0	0	1	0	0	0	0	1
557	1.2	1.8	3	3	9	0	0	1	0	1	0	0	0
558	10	6	3	33	98	0	0	1	0	1	0	0	0
559	1.2	1.8	5	3	9	0	0	1	0	1	0	0	0
560	4.39992	3.29994	8	5.4999	16.4997	1	0	0	0	1	0	0	0
561	38	45	6	151	454	0	0	0	1	1	0	0	0
562	6	4.5	6	7.5	22.5	0	0	0	0	1	0	0	0
563	6	4.5	6	7.5	22.5	0	0	0	0	1	0	0	0
564	8	16	9	22	68	1	0	0	0	1	0	0	0
565	4.39992	3.29994	8	5.4999	16.4997	0	0	0	1	1	0	0	0
566	3.29994	3.29994	5	5.4999	16.4997	0	0	0	1	1	0	0	0
567	10	13	4	24	71	0	0	0	1	1	0	0	0
568	7	16	10	22	68	0	0	0	1	1	0	0	0
569	9	8	8	34	104	0	0	0	0	1	0	0	0
570	3.4285371	5.99994	2	9.9999	29.9997	1	0	0	1	1	0	0	0
571	2.400048	3.00006	4	5.0001	15.0003	1	0	0	0	0	0	1	0
572	3.00006	3.00006	6	5.0001	15.0003	1	0	0	0	0	0	1	0
573	11	5	11	30	91	0	0	0	0	1	0	0	0
574	3.20004	4.80006	5	8.0001	24.0003	0	0	0	0	1	0	0	0
575	3.20004	4.80006	3	8.0001	24.0003	0	0	0	0	1	0	0	0
576	6	4.5	6	7.5	22.5	1	0	0	1	0	0	0	1
577	3.00006	3.00006	6	5.0001	15.0003	0	0	0	0	1	0	0	0
578	2.400048	3.00006	4	5.0001	15.0003	0	0	0	0	1	0	0	0
579	16	44	4	56	168	0	0	0	1	1	0	0	0
580	14	5	13	36	106	0	0	0	0	0	0	1	0
581	12	5	10	36	106	0	0	0	0	0	0	1	0
582	12	5	19	24	71	1	0	0	1	1	0	0	0
583	3.20004	4.80006	3	8.0001	24.0003	0	0	0	0	1	0	0	0
584	12	5	3	36	106	1	0	0	0	1	0	0	0
585	14	3	8	36	106	0	0	0	0	1	0	0	0
586	1.199952	1.49994	4	2.4999	7.4997	0	0	0	0	1	0	0	0
587	36	28	6	127	380	0	0	0	0	1	0	0	0
588	3.29994	3.29994	5	5.4999	16.4997	0	0	0	0	0	0	0	1
589	4.39992	3.29994	8	5.4999	16.4997	0	0	0	0	1	0	0	0
590	14	3	8	36	106	1	0	1	0	1	0	0	0
591	4.39992	3.29994	8	5.4999	16.4997	1	1	1	0	1	0	0	0
592	12	14	5	39	118	0	0	0	0	1	0	0	0
593	12	14	3	39	118	0	0	0	0	1	0	0	0
594	20	34	2	100	300	0	0	0	0	1	0	0	0
595	12	13	14	24	71	0	0	0	0	0	0	1	0
596	6	4.5	6	7.5	22.5	0	0	0	0	0	0	1	0
597	8	10	12	28	82	0	0	0	0	0	1	0	0
598	6	4.5	6	7.5	22.5	1	0	0	0	1	0	0	0
599	2.39994	2.39994	6	3.9999	11.9997	1	0	0	0	0	0	0	1
600	1.919952	2.39994	4	3.9999	11.9997	1	0	0	0	0	0	0	1
601	3.00006	3.00006	6	5.0001	15.0003	0	0	0	0	1	0	0	0
602	4.19994	4.19994	5	6.9999	20.9997	0	0	0	0	0	1	0	0
603	9	15	1	29	86	0	0	0	0	1	0	0	0
604	11	10	4	38	112	1	0	1	0	1	0	0	0
605	4.19994	4.19994	5	6.9999	20.9997	1	0	1	0	0	0	0	1
606	19	14	4	58	175	0	0	0	0	1	0	0	0
607	9	4.5	10	7.5	22.5	1	0	0	0	0	1	0	0
608	1.919952	2.39994	4	3.9999	11.9997	1	1	0	0	0	0	0	1
609	5.59992	4.19994	8	6.9999	20.9997	0	0	0	0	1	0	0	0
610	4.19994	4.19994	5	6.9999	20.9997	0	0	0	0	1	0	0	0
611	10	11	2	30	90	0	0	0	0	1	0	0	0
612	10	11	5	30	90	0	0	0	0	1	0	0	0
613	14	10	34	16	48	0	0	0	1	0	0	0	1
614	16	36	2	58	174	1	0	0	0	1	0	0	0
615	16	17	4	70	211	1	0	0	0	1	0	0	0
616	3	11	10	9	28	0	0	0	0	1	0	0	0
617	6	16	10	14	43	0	0	0	0	1	0	0	0
618	10	11	1	42	125	0	0	0	0	1	0	0	0
619	10	9	3	42	125	0	0	0	0	1	0	0	0
620	3	3	23	6	19	0	0	0	0	0	0	1	0
621	4	4	12	9	27	0	0	0	0	0	0	1	0
622	4	27	1	13	38	0	0	0	0	1	0	0	0
623	41	65	2	181	542	1	1	0	0	1	0	0	0
624	10	24	3	35	105	1	1	0	0	1	0	0	0
625	24	22	4	90	271	0	0	0	0	1	0	0	0
626	3	3	3	9	28	0	0	0	0	1	0	0	0
627	0.51428571	0.9	2	1.5	4.5	0	0	0	0	1	0	0	0
628	5	0	0	11	31	1	0	1	0	0	0	1	0
629	0.17146286	0.30006	2	0.5001	1.5003	1	1	1	0	0	0	1	0
630	32	41	4	177	531	0	0	0	0	1	0	0	0
631	14	25	1	68	203	0	0	0	0	1	0	0	0
632	0.6	0.6	5	1	3	0	0	0	0	1	0	0	0
633	18	27	2	75	219	0	0	0	0	1	0	0	0
634	0.6	0.6	5	1	3	0	0	0	0	1	0	0	0
635	4	7	2	7	21	0	0	0	0	1	0	0	0
636	16	20	5	47	140	0	0	0	1	1	0	0	0
637	50	66	2	192	575	0	0	0	0	1	0	0	0
638	42	56	1	210	625	1	0	0	0	1	0	0	0
639	4	1	3	13	40	0	0	0	0	0	0	1	0
640	5	5	6	15	37	0	0	0	0	0	0	1	0
641	6	6	5	15	37	0	0	0	0	0	0	1	0
642	15	11	13	44	131	1	0	0	0	1	0	0	0
643	2	1	5	7	21	0	0	0	1	0	0	1	0
644	2	1	6	7	21	0	0	0	1	0	0	1	0
645	29	14	2	64	193	1	0	0	0	1	0	0	0
646	28	27	2	113	339	0	0	0	0	0	1	0	0
647	4	3	6	11	33	1	1	0	0	0	1	0	0
648	9	11	6	19	56	0	0	0	0	1	0	0	0
649	6	3	2	21	62	0	0	0	0	1	0	0	0
650	6	3	2	21	63	0	0	0	0	1	0	0	0
651	20	8	1	37	110	0	0	0	0	1	0	0	0
652	13	8	2	39	116	0	0	0	0	1	0	0	0
653	13	6	12	28	83	1	0	1	0	1	0	0	0
654	0.68574857	1.20006	4	2.0001	6.0003	0	1	1	0	1	0	0	0
655	0.68574857	1.20006	2	2.0001	6.0003	0	1	1	0	1	0	0	0
656	0.3	0.3	5	0.5	1.5	1	0	0	0	0	0	0	1
657	0.3	0.3	5	0.5	1.5	1	0	0	0	0	0	1	0
658	8	5	5	36	107	1	1	0	0	0	1	0	0
659	3	5	2	8	22	0	0	1	0	0	0	0	1
660	14	25	2	47	124	0	0	0	1	1	0	0	0
661	4	2	15	7	21	0	0	0	1	0	0	0	1
662	29	19	3	82	246	0	0	0	0	1	0	0	0
663	0.68574857	1.20006	2	2.0001	6.0003	0	0	0	0	1	0	0	0
664	0.68574857	1.20006	2	2.0001	6.0003	0	0	0	0	0	0	1	0
665	0.68574857	1.20006	2	2.0001	6.0003	0	0	0	0	0	0	1	0
666	2	2	6	6	17	0	0	0	0	1	0	0	0
667	5	8	1	20	59	1	0	1	0	1	0	0	0
668	5	7	1	19	58	1	0	1	0	1	0	0	0
669	12	15	3	32	96	0	1	0	0	1	0	0	0
670	33	49	7	134	403	0	0	0	1	1	0	0	0
671	2.4	1.8	6	3	9	0	0	0	1	0	0	0	1
672	2.4	1.8	6	3	9	0	0	0	1	0	0	0	1
673	9	10	2	30	89	0	1	0	0	1	0	0	0
674	36	75	2	146	437	0	0	0	0	1	0	0	0
675	2.16	2.7	4	4.5	13.5	0	0	0	0	1	0	0	0
676	0.6	0.9	5	1.5	4.5	1	0	0	0	1	0	0	0
677	0.6	0.9	3	1.5	4.5	1	0	0	0	1	0	0	0
678	2.60004	3.90006	3	6.5001	19.5003	0	0	0	0	0	0	0	1
679	2.60004	3.90006	3	6.5001	19.5003	0	0	0	0	0	0	0	1
680	2.60004	3.90006	3	6.5001	19.5003	0	0	0	0	0	0	0	1
681	32	44	2	177	530	1	0	0	0	1	0	0	0
682	6	7	10	13	40	0	0	0	0	1	0	0	0
683	6	8	13	16	48	0	0	0	0	1	0	0	0
684	7	3	2	22	67	0	0	0	0	1	0	0	0
685	12	16	5	40	121	1	0	0	0	1	0	0	0
686	26	23	5	98	296	1	0	0	0	0	1	0	0
687	7	2	25	7	22	1	0	0	0	0	0	0	1
688	4	4	24	10	31	1	0	0	0	0	0	0	1
689	38	38	5	131	394	0	0	0	0	1	0	0	0
690	11	14	31	23	68	0	0	0	0	0	0	0	1
691	23	17	3	98	295	0	0	1	0	0	1	0	0
692	4	2	3	6	18	0	0	0	0	1	0	0	0
693	4	2	5	6	18	0	0	0	0	1	0	0	0
694	7	17	1	18	55	0	0	0	1	1	0	0	0
695	31	37	1	182	546	0	0	0	1	1	0	0	0
696	1.2	1.8	3	3	9	0	0	0	1	1	0	0	0
697	1.3713943	2.39994	4	3.9999	11.9997	1	0	0	0	0	0	0	1
698	1.3713943	2.39994	2	3.9999	11.9997	1	0	0	0	0	0	0	1
699	4	2	16	9	27	0	0	0	1	0	0	0	1
700	4	2	17	9	27	0	0	0	1	0	0	0	1
701	29	23	3	92	276	0	1	0	0	0	1	0	0
702	15	8	11	26	78	1	0	0	0	0	1	0	0
703	2.7	2.7	5	4.5	13.5	1	0	0	0	0	0	0	1
704	9	8	3	35	105	0	0	0	0	1	0	0	0
705	9	5	1	35	106	1	1	0	0	0	1	0	0
706	1.10004	1.65006	3	2.7501	8.2503	1	1	0	0	0	0	0	1
707	29	38	3	112	336	0	0	0	1	1	0	0	0
708	13	15	9	33	98	1	0	0	1	1	0	0	0
709	27	33	2	131	394	1	0	0	1	1	0	0	0
710	2	0	0	6	18	1	1	0	0	1	0	0	0
711	20	29	4	65	196	1	0	0	0	1	0	0	0
712	21	26	5	73	216	0	0	0	0	1	0	0	0
713	0.45	0.45	5	0.75	2.25	0	0	0	0	0	0	0	1
714	0.45	0.45	5	0.75	2.25	0	0	0	0	0	0	0	1
715	10	10	5	41	122	0	0	0	0	0	0	1	0
716	7	2	2	24	72	1	0	0	0	1	0	0	0
717	12	35	5	47	140	1	0	0	0	1	0	0	0
718	11	10	6	47	140	1	0	0	0	1	0	0	0
719	4	1	7	12	37	1	1	1	0	0	0	1	0
720	6	8	4	20	60	1	0	0	1	1	0	0	0
721	0.6	0.45	8	0.75	2.25	1	0	0	1	0	0	0	1
722	13	12	5	52	157	1	0	0	1	0	0	0	1
723	12	17	3	48	144	0	0	0	0	1	0	0	0
724	6	6.1	7	17	51	0	0	0	0	1	0	0	0
725	5	9	5	17	51	0	0	0	0	1	0	0	0
726	10	17	4	41	122	1	0	1	0	1	0	0	0
727	6	5	8	19	57	1	0	0	0	1	0	0	0
728	0.68574857	1.20006	2	2.0001	6.0003	0	0	0	0	1	0	0	0
729	49	96	3	313	933	0	0	0	0	1	0	0	0
730	3	3	23	6	19	1	0	0	0	0	0	1	0
731	5	6	8	13	39	1	0	0	0	0	0	1	0
732	6	10	2	23	68	0	0	0	0	1	0	0	0
733	6	5	6	23	68	1	0	0	0	1	0	0	0
734	0.85710857	1.49994	2	2.4999	7.4997	1	0	0	0	0	0	0	1
735	19	33	2	66	199	1	0	0	0	1	0	0	0
736	17	28	1	62	187	1	0	0	0	1	0	0	0
737	41	33	5	205	591	1	0	0	1	1	0	0	0
738	3	5	6	7	20	1	0	0	1	0	0	0	1
739	13	5	3	45	136	0	0	0	0	1	0	0	0
740	37	35	3	222	665	0	0	1	0	1	0	0	0
741	17	13	11	53	159	1	0	0	0	1	0	0	0
742	15	13	10	53	159	1	0	0	0	1	0	0	0
743	9	8	2	32	96	1	0	0	0	1	0	0	0
744	42	47	6	201	604	1	0	0	0	0	1	0	0
745	18	24	21	38	114	1	0	0	0	0	0	0	1
746	12	24	1	42	125	1	1	0	0	0	1	0	0
747	12	13	1	42	125	1	1	0	0	0	1	0	0
748	17	16	3	79	238	1	0	0	0	0	1	0	0
749	17	14	2	79	238	1	0	0	0	0	1	0	0
750	20	7	6	41	122	1	0	0	0	0	1	0	0
751	23	9	7	72	216	1	0	0	0	0	1	0	0
752	1.3713943	2.39994	4	3.9999	11.9997	0	1	0	0	1	0	0	0
753	1.3713943	2.39994	2	3.9999	11.9997	0	1	0	0	1	0	0	0
754	1.3713943	2.39994	4	3.9999	11.9997	0	1	0	0	1	0	0	0
755	10	13	5	33	99	0	0	0	0	0	1	0	0
756	6	8	3	23	68	0	0	0	0	0	1	0	0
757	27	39	3	97	292	0	0	0	0	1	0	0	0
758	6	15	7	21	63	0	0	0	0	1	0	0	0
759	6	10	3	24	71	1	1	0	0	1	0	0	0
760	6	10	2	24	71	1	1	0	0	0	0	1	0
761	4	1	2	12	37	1	0	0	0	0	0	1	0
762	28	39	5	133	399	1	0	0	1	1	0	0	0
763	2	2	11	7	21	0	0	0	0	0	0	0	1
764	5	17	6	20	60	0	0	0	0	1	0	0	0
765	2	2	5	7	21	0	0	0	0	0	0	0	1
766	20	29	5	77	230	0	0	0	0	1	0	0	0
767	15	24	2	48	143	0	0	0	0	1	0	0	0
768	32	120	0	122	366	0	1	1	0	1	0	0	0
769	10	8	3	33	98	1	1	1	0	0	1	0	0
770	1.0285714	1.8	2	3	9	1	1	1	0	0	0	0	1
771	10	20	1	35	106	0	0	0	0	0	1	0	0
772	55	37	5	222	665	1	0	0	0	1	0	0	0
773	6	25	3	23	69	0	0	0	0	1	0	0	0
774	0.50004	0.75006	5	1.2501	3.7503	0	0	0	0	1	0	0	0
775	14	26	9	40	119	0	0	0	1	1	0	0	0
776	27	32	6	85	254	1	0	0	0	1	0	0	0
777	20	26	10	74	220	1	0	0	0	0	0	0	1
778	4.20012	2.10006	10	3.5001	10.5003	1	0	0	0	0	0	0	1
779	3	3	1	7	22	0	0	0	0	1	0	0	0
780	39	39	5	90	271	1	0	0	0	0	1	0	0
781	4	5	6	10	29	0	0	0	1	0	0	1	0
782	3	5	7	6	17	0	0	0	1	0	0	1	0
783	6	18	3	23	69	0	0	0	0	1	0	0	0
784	6	17	4	23	69	0	0	0	0	1	0	0	0
785	10	39	1	23	69	0	0	0	0	1	0	0	0
786	11	6	3	35	103	0	0	0	0	1	0	0	0
787	9	6	2	35	103	0	0	0	0	1	0	0	0
788	13	11	2	60	180	1	0	0	0	1	0	0	0
789	11	6	3	35	104	1	0	0	0	1	0	0	0
790	7	13	3	25	75	1	0	0	0	1	0	0	0
791	13	120	0	46	139	0	0	0	0	1	0	0	0
792	29	24	5	126	379	0	0	0	0	0	1	0	0
793	1	1	3	4	12	0	0	0	0	1	0	0	0
794	20	21	5	80	241	0	0	0	0	1	0	0	0
795	20	17	4	55	165	1	0	0	0	0	1	0	0
796	3.19992	2.39994	6	3.9999	11.9997	1	0	0	0	0	0	0	1
797	10	8	12	24	71	0	0	0	1	1	0	0	0
798	48	31	12	148	444	1	0	0	0	0	1	0	0
799	8	9	21	16	47	1	0	0	0	0	0	1	0
800	10	16	3	28	86	0	1	0	0	1	0	0	0
801	19	8	17	40	120	0	0	0	0	1	0	0	0
802	18	25	22	42	126	0	0	0	0	1	0	0	0
803	5	4	2	21	63	1	0	0	0	0	1	0	0
804	1.0285714	1.8	2	3	9	1	0	0	0	0	0	0	1
805	19	17	6	62	185	1	0	0	0	0	1	0	0
806	1.99992	1.49994	6	2.4999	7.4997	1	0	0	0	0	1	0	0
807	6	3	5	16	47	0	0	1	0	1	0	0	0
808	2.7	2.7	6	4.5	13.5	1	0	0	0	1	0	0	0
809	6	4	10	22	66	1	0	0	0	1	0	0	0
810	21	14	8	72	214	0	0	0	0	1	0	0	0
811	5	5	6	15	44	0	0	0	1	1	0	0	0
812	3.00006	3.00006	6	5.0001	15.0003	1	1	0	0	0	0	1	0
813	21	16	18	23	70	0	0	0	0	0	1	0	0
814	2.80008	2.10006	6	3.5001	10.5003	0	0	0	0	0	0	0	1
815	16	17	24	24	72	0	0	0	0	0	1	0	0
816	16	16	21	24	72	0	0	0	0	0	1	0	0
817	4.39992	3.29994	6	5.4999	16.4997	1	0	0	0	0	0	0	1
818	6.59988	3.29994	10	5.4999	16.4997	1	0	0	0	0	0	0	1
819	17	22	3	51	150	1	1	0	1	0	1	0	0
820	25	26	2	71	212	1	0	0	1	1	0	0	0
821	9	8	10	24	71	0	0	0	0	1	0	0	0
822	33	15	6	50	149	1	0	0	0	0	0	1	0
823	10	13	27	17	51	1	0	0	0	0	1	0	0
824	17	16	23	24	73	0	0	0	1	1	0	0	0
825	11	16	21	24	73	0	0	0	1	1	0	0	0
826	16	9	20	19	58	0	0	0	1	1	0	0	0
827	17	13	5	48	142	0	0	0	1	1	0	0	0
828	17	16	5	48	142	0	0	0	1	1	0	0	0
829	19	16	12	80	239	1	0	0	0	1	0	0	0
830	54	51	5	107	321	1	1	0	0	1	0	0	0
831	39	55	5	187	562	1	1	0	0	1	0	0	0
832	18	43	5	86	257	1	1	0	0	1	0	0	0
833	4	2	4	14	42	0	1	0	0	1	0	0	0
834	4	2	2	14	42	0	1	0	0	1	0	0	0
835	7	10	5	23	68	0	1	0	0	1	0	0	0
836	11	14	64	24	72	1	0	0	0	0	1	0	0
837	15	26	12	64	190	0	0	0	0	0	1	0	0
838	20	25	18	51	152	0	0	0	0	0	0	0	1
839	3.19992	2.39994	6	3.9999	11.9997	0	0	0	0	1	0	0	0
840	28	23	6	90	271	1	0	0	0	1	0	0	0
841	2.60004	3.90006	3	6.5001	19.5003	1	0	0	0	0	0	0	1
842	6	6	21	24	70	1	0	0	1	1	0	0	0
843	13	22	10	40	120	1	0	0	0	0	1	0	0
844	19	16	17	24	72	1	0	0	0	0	1	0	0
845	3.359952	4.19994	4	6.9999	20.9997	0	0	0	0	0	0	1	0
846	7.80012	3.90006	10	6.5001	19.5003	1	0	1	0	0	0	1	0
847	2.40012	1.20006	10	2.0001	6.0003	0	0	0	1	0	0	0	1
848	8	11	4	22	66	1	1	0	0	1	0	0	0
849	2.400048	3.00006	4	5.0001	15.0003	1	1	0	0	0	0	0	1
850	36	31	5	89	267	0	1	0	0	0	1	0	0
851	3.40008	2.55006	6	4.2501	12.7503	0	1	0	0	0	0	0	1
852	7.80012	3.90006	10	6.5001	19.5003	1	0	0	0	0	1	0	0
853	7.80012	3.90006	10	6.5001	19.5003	1	0	0	0	0	1	0	0
854	15	14	11	51	152	0	0	0	0	1	0	0	0
855	62	29	10	168	504	1	0	0	1	1	0	0	0
856	28	25	23	42	125	0	0	1	0	0	1	0	0
857	11	2	11	16	49	1	1	0	0	0	1	0	0
858	16	9	22	36	109	1	1	0	0	0	0	0	1
859	12	20	3	42	124	0	0	0	1	1	0	0	0
860	50	37	5	196	587	0	0	0	1	1	0	0	0
861	39	54	2	146	438	0	0	0	1	1	0	0	0
862	22	32	2	80	240	0	0	0	1	1	0	0	0
863	18	18	16	54	158	0	0	0	1	1	0	0	0
864	8	5	21	13	38	0	0	0	0	0	1	0	0
865	31	41	4	112	336	0	0	0	0	1	0	0	0
866	12	7	18	16	48	1	1	0	0	0	1	0	0
867	2.80008	2.10006	6	3.5001	10.5003	0	0	0	1	0	0	0	1
868	25	47	2	93	279	1	0	0	0	0	1	0	0
869	10	16	5	47	140	0	0	0	0	0	1	0	0
870	38	35	3	236	700	0	0	0	0	1	0	0	0
871	3.120048	3.90006	4	6.5001	19.5003	0	0	0	0	1	0	0	0
872	3.120048	3.90006	4	6.5001	19.5003	0	0	0	0	1	0	0	0
873	24	24	9	85	255	1	0	0	0	1	0	0	0
874	2.80008	2.10006	6	3.5001	10.5003	1	0	0	0	0	0	0	1
875	14	4	17	17	51	1	0	0	0	0	0	0	1
876	22	30	11	64	194	1	0	0	0	0	1	0	0
877	10	11	22	18	53	1	0	0	0	0	1	0	0
878	6	7	21	12	35	0	0	0	0	0	0	0	1
879	33	16	8	67	200	0	0	0	0	0	1	0	0
880	49	37	6	218	636	0	0	0	0	0	1	0	0
881	42	33	5	226	679	0	0	0	0	0	1	0	0
882	18	18	10	47	142	0	1	0	0	1	0	0	0
883	6.59988	3.29994	10	5.4999	16.4997	1	0	0	0	1	0	0	0
884	12	9	24	18	55	0	0	0	0	1	0	0	0
885	3.19992	2.39994	6	3.9999	11.9997	0	0	0	0	0	0	0	1
886	3.19992	2.39994	6	3.9999	11.9997	0	0	0	0	0	0	0	1
887	2.80008	2.10006	6	3.5001	10.5003	0	0	0	0	0	0	0	1
888	2.80008	2.10006	6	3.5001	10.5003	0	0	0	0	0	0	0	1
889	3.19992	2.39994	6	3.9999	11.9997	1	0	1	0	0	0	1	0
890	8	7	22	16	49	1	0	1	0	0	0	1	0
891	4.79988	2.39994	10	3.9999	11.9997	1	0	1	0	0	0	1	0
892	20	17	39	26	78	1	0	0	0	0	0	1	0
893	12	17	47	26	78	1	0	0	0	0	0	1	0
894	21	22	3	69	206	0	1	1	0	1	0	0	0
895	20	20	4	93	279	0	0	0	0	1	0	0	0
896	4	6	21	6	18	0	0	0	0	0	1	0	0
897	21	7	8	40	120	0	0	0	1	1	0	0	0
898	5	11	21	12	36	0	0	0	1	1	0	0	0
899	24	26	9	95	284	0	0	0	1	1	0	0	0
900	23	34	6	73	220	0	0	0	0	1	0	0	0
901	5	10	5	15	44	0	0	0	0	1	0	0	0
902	1.199952	1.49994	4	2.4999	7.4997	0	0	0	0	1	0	0	0
903	37	35	6	109	328	1	1	0	1	0	1	0	0
904	15	15	24	33	100	1	1	0	1	0	0	0	1
905	29	27	4	94	281	1	0	0	0	1	0	0	0
906	4.00008	3.00006	6	5.0001	15.0003	1	0	0	0	0	0	0	1
907	6	9	7	13	38	0	0	0	0	0	1	0	0
908	35	29	3	124	371	0	0	0	0	0	1	0	0
909	18	23	6	69	207	0	0	0	0	1	0	0	0
910	2.4	1.8	6	3	9	0	0	0	0	0	0	0	1
911	8	9	9	26	78	1	0	0	0	1	0	0	0
912	2.7	2.7	6	4.5	13.5	0	0	0	0	0	0	1	0
913	56	64	4	277	831	0	0	0	1	1	0	0	0
914	42	32	11	123	369	0	0	0	0	0	1	0	0
915	15	25	35	37	111	0	0	0	0	0	0	0	1
916	1.919952	2.39994	4	3.9999	11.9997	1	0	1	0	0	0	1	0
917	15	10	5	52	156	1	0	1	0	0	1	0	0
918	32	48	9	80	242	1	0	0	0	1	0	0	0
919	13	8	15	40	120	1	0	0	0	1	0	0	0
920	4.79988	2.39994	10	3.9999	11.9997	1	0	0	0	0	0	0	1
921	3.19992	2.39994	6	3.9999	11.9997	1	0	0	0	0	0	0	1
922	30	23	10	62	185	0	0	0	0	1	0	0	0
923	21	11	16	30	92	1	0	0	0	0	0	0	1
924	15	11	18	30	92	1	0	0	0	0	0	0	1
925	11	16	6	27	80	1	0	1	0	0	1	0	0
926	2.7	2.7	6	4.5	13.5	1	1	0	0	0	0	1	0
927	40	34	4	191	572	0	0	0	0	1	0	0	0
928	21	6	30	30	89	0	0	0	0	1	0	0	0
929	28	9	7	49	147	1	0	0	1	0	1	0	0
930	28	24	18	38	114	1	0	0	0	1	0	0	0
931	1.0285714	1.8	4	3	9	1	0	0	0	0	0	1	0
932	20	22	21	36	109	0	0	0	1	0	1	0	0
933	12	22	28	36	109	0	0	0	1	0	1	0	0
934	6	5	18	6	18	0	0	1	0	0	0	0	1
935	14	9	46	29	87	0	0	0	0	0	1	0	0
936	24	21	8	82	246	0	0	0	0	1	0	0	0
937	0.6	0.9	5	1.5	4.5	0	0	0	0	1	0	0	0
938	16	9	7	40	120	0	0	0	1	1	0	0	0
939	12	3	8	35	106	0	0	0	0	1	0	0	0
940	21	20	7	68	205	1	0	0	0	1	0	0	0
941	39	51	3	182	546	0	0	0	0	1	0	0	0
942	21	6	35	30	89	1	0	0	1	0	1	0	0
943	2.80008	2.10006	6	3.5001	10.5003	0	0	0	0	0	0	0	1
944	13	12	30	23	68	0	0	0	0	0	1	0	0
945	20	16	4	70	209	1	0	0	0	0	1	0	0
946	19	14	17	26	76	0	0	0	0	0	1	0	0
947	18	15	12	36	107	1	0	0	0	1	0	0	0
948	28	22	4	78	235	0	0	0	0	0	1	0	0
949	0.99996	1.49994	3	2.4999	7.4997	0	0	0	0	0	0	0	1
950	13	11	25	18	55	0	0	0	0	1	0	0	0
951	5	8	22	10	30	0	0	0	0	1	0	0	0
952	11	16	28	27	80	0	0	0	0	1	0	0	0
953	6	6	22	12	35	1	0	0	1	0	0	0	1
954	34	17	6	104	312	1	0	0	0	0	1	0	0
955	19	30	1	104	313	0	1	0	0	1	0	0	0
956	9	9	2	30	90	0	0	0	0	1	0	0	0
957	45	32	3	118	354	0	0	0	1	1	0	0	0
958	2.4	1.8	6	3	9	0	0	0	1	0	0	0	1
959	1.60008	1.20006	6	2.0001	6.0003	0	0	0	1	0	0	0	1
960	2.4	1.8	6	3	9	1	0	0	1	0	0	0	1
961	2.4	1.8	6	3	9	1	0	0	0	0	0	0	1
962	3.19992	2.39994	6	3.9999	11.9997	0	0	0	1	1	0	0	0
963	14	13	14	32	96	1	0	0	0	1	0	0	0
964	18	12	28	26	80	1	0	0	0	0	1	0	0
965	10	8	12	24	71	0	0	0	0	0	1	0	0
966	2.16	2.7	4	4.5	13.5	0	0	0	0	1	0	0	0
967	2.16	2.7	4	4.5	13.5	0	0	0	0	1	0	0	0
968	8	2	7	20	60	0	0	0	0	1	0	0	0
969	4.00008	3.00006	6	5.0001	15.0003	0	1	0	0	0	0	0	1
970	30	15	4	67	201	0	0	0	0	0	1	0	0
971	32	30	3	117	350	0	0	0	0	1	0	0	0
972	2.99988	1.49994	10	2.4999	7.4997	1	0	0	0	0	0	1	0
973	1.99992	1.49994	6	2.4999	7.4997	1	0	0	0	0	0	0	1
974	26	12	22	41	119	0	0	0	1	0	1	0	0
975	9	10	17	14	43	1	0	1	0	0	1	0	0
976	27	25	11	45	135	0	1	1	0	0	1	0	0
977	11	12	66	18	56	0	0	0	0	0	1	0	0
978	20	11	13	53	160	0	0	0	1	0	1	0	0
979	9	7	47	21	62	0	0	0	1	0	0	0	1
980	12	19	9	48	141	0	0	0	0	1	0	0	0
981	41	27	4	132	397	0	0	0	0	0	1	0	0
982	35	13	8	69	206	1	0	0	0	0	1	0	0
983	8	10	22	15	45	1	0	0	0	0	1	0	0
984	30	36	6	141	424	0	0	0	1	0	1	0	0
985	1.71432	3.00006	2	5.0001	15.0003	0	1	0	0	1	0	0	0
986	18	30	3	54	163	1	0	0	1	1	0	0	0
987	29	18	26	47	142	0	0	0	0	0	1	0	0
988	4.00008	3.00006	6	5.0001	15.0003	0	0	0	0	0	0	0	1
989	9	5	22	14	40	1	0	0	1	0	0	1	0
990	7.80012	3.90006	10	6.5001	19.5003	1	0	0	1	1	0	0	0
991	5	11	21	12	36	0	0	0	1	0	0	0	1
992	64	86	3	309	928	0	0	0	1	1	0	0	0
993	63	85	5	309	928	0	0	0	1	1	0	0	0
994	31	23	8	50	146	0	0	0	1	1	0	0	0
995	37	16	11	75	224	0	0	0	0	0	1	0	0
996	18	10	27	41	123	0	0	0	0	0	1	0	0
997	29	17	23	41	123	0	0	0	0	0	1	0	0
998	6	4	11	9	28	0	0	0	0	0	0	0	1
999	1.94994	1.94994	5	3.2499	9.7497	1	0	0	0	0	0	1	0
1000	7	3	65	11	34	0	1	0	1	0	0	0	1
1001	8	11	4	24	72	0	0	0	0	1	0	0	0
1002	7	15	5	14	43	0	0	0	0	0	1	0	0
1003	2.80008	2.10006	6	3.5001	10.5003	0	0	0	0	0	0	0	1
1004	9	3	34	12	36	1	0	0	0	0	1	0	0
1005	17	16	6	56	168	1	0	0	0	1	0	0	0
1006	4	5	21	6	18	1	0	0	0	0	0	0	1
1007	22	10	21	26	76	0	0	0	1	0	1	0	0
1008	8	8	21	12	36	0	0	0	1	0	0	0	1
1009	8	10	42	14	42	0	0	0	1	0	0	0	1
1010	17	21	8	39	116	1	0	0	0	1	0	0	0
1011	16	15	3	47	141	1	0	1	0	1	0	0	0
1012	18	23	21	41	122	0	0	0	0	0	0	0	1
1013	33	19	7	64	192	1	0	0	1	1	0	0	0
1014	18	16	15	60	181	0	0	0	0	1	0	0	0
1015	19	16	15	60	181	0	0	0	0	1	0	0	0
1016	1.8	2.7	5	4.5	13.5	0	0	0	0	1	0	0	0
1017	1.60008	1.20006	6	2.0001	6.0003	0	0	0	0	0	0	0	1
1018	25	16	8	43	130	0	0	0	0	1	0	0	0
1019	9	8	3	31	93	0	0	0	1	1	0	0	0
1020	21	13	11	46	137	0	0	0	0	1	0	0	0
1021	4.00008	3.00006	8	5.0001	15.0003	0	0	0	0	1	0	0	0
1022	1.8	2.7	5	4.5	13.5	1	0	0	0	0	0	0	1
1023	1.8	2.7	3	4.5	13.5	1	0	0	0	0	0	0	1
1024	13	12	30	23	68	1	0	0	0	0	1	0	0
1025	19	23	21	47	139	1	0	0	1	1	0	0	0
1026	11	7	16	24	71	1	0	0	0	1	0	0	0
1027	12	12	16	27	80	1	0	0	0	0	0	1	0
1028	3.6	3.6	6	6	18	1	0	1	0	0	0	0	1
1029	2.80008	2.10006	6	3.5001	10.5003	1	1	1	0	0	0	0	1
1030	7	3	17	10	29	1	0	0	0	0	0	0	1
1031	26	28	7	59	177	0	0	0	0	1	0	0	0
1032	10	14	22	20	60	0	0	0	0	1	0	0	0
1033	44	37	10	174	521	1	0	0	0	0	1	0	0
1034	17	15	9	50	150	1	0	0	0	0	1	0	0
1035	2.88	3.6	4	6	18	1	0	0	0	0	0	0	1
1036	13	12	30	23	68	1	0	0	0	0	1	0	0
1037	2.4	1.8	6	3	9	1	0	0	0	0	1	0	0
1038	15	11	2	38	114	1	0	0	0	0	0	0	1
1039	6	7	21	11	34	1	0	0	0	0	0	0	1
1040	17	31	4	50	150	0	0	0	1	1	0	0	0
1041	7	12	3	23	68	0	0	0	1	1	0	0	0
1042	6	12	4	23	68	0	0	0	1	1	0	0	0
1043	15	11	2	38	114	1	1	0	0	0	1	0	0
1044	2.16	2.7	4	4.5	13.5	1	0	0	0	0	0	0	1
1045	27	15	10	111	332	0	0	0	0	1	0	0	0
1046	7	8	21	15	44	0	0	0	0	1	0	0	0
1047	13	11	7	33	98	0	0	0	0	1	0	0	0
1048	13	13	4	33	98	0	0	0	0	1	0	0	0
1049	10	13	4	24	71	0	0	0	0	0	0	1	0
1050	11	7	2	41	122	0	0	0	0	1	0	0	0
1051	4.39992	3.29994	8	5.4999	16.4997	1	0	0	0	1	0	0	0
1052	3.29994	3.29994	5	5.4999	16.4997	1	0	0	0	1	0	0	0
1053	9	2	3	34	104	0	0	0	0	1	0	0	0
1054	9	8	8	34	104	0	0	0	0	1	0	0	0
1055	17	17	11	54	161	1	0	1	0	0	1	0	0
1056	4.39992	3.29994	8	5.4999	16.4997	1	0	0	1	0	0	0	1
1057	3.29994	3.29994	5	5.4999	16.4997	1	0	0	1	0	0	0	1
1058	14	17	3	52	155	0	1	0	0	1	0	0	0
1059	20	10	4	54	164	0	1	0	0	1	0	0	0
1060	49	49	2	219	658	0	0	0	1	0	1	0	0
1061	3.29994	3.29994	5	5.4999	16.4997	0	0	0	0	1	0	0	0
1062	6	4.5	6	7.5	22.5	1	0	0	0	0	1	0	0
1063	6	4.5	6	7.5	22.5	1	0	0	0	0	1	0	0
1064	3.00006	3.00006	6	5.0001	15.0003	1	1	0	1	1	0	0	0
1065	2.400048	3.00006	4	5.0001	15.0003	1	1	0	1	0	0	0	1
1066	15	17	14	30	91	0	0	0	0	0	1	0	0
1067	3.00006	3.00006	6	5.0001	15.0003	0	1	0	0	0	0	0	1
1068	4.39992	3.29994	8	5.4999	16.4997	1	0	0	1	0	0	1	0
1069	10	13	14	24	71	0	0	0	1	1	0	0	0
1070	3.29994	3.29994	5	5.4999	16.4997	1	0	0	0	0	0	0	1
1071	12	5	19	24	71	0	0	0	0	1	0	0	0
1072	15	17	14	30	91	0	0	0	1	1	0	0	0
1073	11	5	11	30	91	0	0	0	1	1	0	0	0
1074	3.29994	3.29994	5	5.4999	16.4997	1	1	0	0	1	0	0	0
1075	3.29994	3.29994	5	5.4999	16.4997	0	0	1	0	0	0	1	0
1076	3.29994	3.29994	5	5.4999	16.4997	0	0	1	0	0	0	1	0
1077	3.20004	4.80006	5	8.0001	24.0003	1	0	0	1	0	0	0	1
1078	3.20004	4.80006	3	8.0001	24.0003	1	0	0	1	0	0	0	1
1079	20	15	12	71	214	0	0	0	0	1	0	0	0
1080	18	29	10	71	214	0	0	0	0	1	0	0	0
1081	3.29994	3.29994	5	5.4999	16.4997	1	0	0	0	0	1	0	0
1082	51	37	9	160	479	0	1	0	0	0	1	0	0
1083	10	13	34	20	60	0	1	0	0	0	0	0	1
1084	6	4	6	16	50	1	0	0	0	1	0	0	0
1085	4.19994	4.19994	5	6.9999	20.9997	0	0	0	0	0	0	0	1
1086	1.65006	1.65006	6	2.7501	8.2503	1	0	0	0	1	0	0	0
1087	7	2	3	21	63	1	0	0	0	1	0	0	0
1088	1.320048	1.65006	4	2.7501	8.2503	1	0	0	0	1	0	0	0
1089	8	2	8	21	63	1	0	0	0	1	0	0	0
1090	5.59992	4.19994	8	6.9999	20.9997	0	0	0	0	1	0	0	0
1091	22	15	5	79	236	0	0	0	0	1	0	0	0
1092	13	15	4	38	115	0	0	0	0	1	0	0	0
1093	4.19994	4.19994	5	6.9999	20.9997	0	0	0	0	1	0	0	0
1094	19	14	4	58	175	0	0	0	0	1	0	0	0
1095	16	21	1	60	179	1	1	0	0	0	1	0	0
1096	1	4	4	2	7	0	0	0	1	0	0	0	1
1097	1	4	5	2	7	0	0	0	1	0	0	0	1
1098	10	9	7	26	76	0	0	0	0	0	1	0	0
1099	13	16	10	44	131	0	0	0	0	1	0	0	0
1100	10	10	17	30	91	0	0	0	0	1	0	0	0
1101	3	12.5	3	8	23	0	1	0	0	0	0	0	1
1102	43	26	5	167	502	0	0	0	1	0	1	0	0
1103	6	2	43	11	33	0	0	0	1	0	1	0	0
1104	8	10	3	33	99	0	0	0	0	1	0	0	0
1105	8	10	5	33	99	0	0	0	0	1	0	0	0
1106	26	31	2	131	394	0	0	0	1	1	0	0	0
1107	18	30	3	64	192	0	0	0	1	1	0	0	0
1108	4	1	2	10	29	0	0	0	1	1	0	0	0
1109	33	49	1	135	406	0	0	0	0	1	0	0	0
1110	6	9	2	23	69	0	0	0	0	1	0	0	0
1111	19	27	1	79	237	0	0	0	0	0	1	0	0
1112	32	56	3	248	743	0	0	0	1	1	0	0	0
1113	1.65006	1.65006	6	2.7501	8.2503	0	0	0	1	1	0	0	0
1114	26	43	1	101	302	0	0	0	0	1	0	0	0
1115	26	44	4	101	302	0	0	0	0	1	0	0	0
1116	15	25	3	55	166	1	0	0	0	1	0	0	0
1117	3.90006	3.90006	5	6.5001	19.5003	1	0	0	0	1	0	0	0
1118	18	29	3	95	286	0	0	0	1	1	0	0	0
1119	7	2	3	21	63	0	0	0	1	1	0	0	0
1120	7	7	2	19	55	1	0	1	0	0	1	0	0
1121	5	6	15	10	23	1	0	1	0	0	0	0	1
1122	15	17	2	49	147	1	0	0	0	1	0	0	0
1123	0.9	0.9	6	1.5	4.5	1	0	0	0	0	0	0	1
1124	2	2	3	6	18	1	0	0	0	0	0	1	0
1125	28	46	11	149	447	0	0	0	0	1	0	0	0
1126	17	9	11	39	116	1	0	0	0	0	1	0	0
1127	12	9	11	33	99	1	0	0	0	0	1	0	0
1128	3	2	35	4	13	1	0	0	0	0	0	0	1
1129	8	8	2	30	90	0	0	0	0	1	0	0	0
1130	8	8	3	30	90	0	0	0	0	1	0	0	0
1131	38	40	2	144	432	1	0	0	0	1	0	0	0
1132	20	33	1	74	222	0	0	0	1	1	0	0	0
1133	5	3	14	11	33	0	0	0	1	1	0	0	0
1134	6	3	2	21	62	0	0	0	0	0	0	1	0
1135	6	3	3	21	62	0	0	0	0	0	0	1	0
1136	19	12	5	55	166	0	0	0	0	0	1	0	0
1137	45	41	5	157	452	0	0	0	0	1	0	0	0
1138	1.680048	2.10006	4	3.5001	10.5003	0	0	0	0	0	0	0	1
1139	0.45	0.45	6	0.75	2.25	1	1	0	0	1	0	0	0
1140	0.36	0.45	4	0.75	2.25	1	1	0	0	1	0	0	0
1141	42	49	2	156	467	1	0	0	1	1	0	0	0
1142	0.479952	0.59994	4	0.9999	2.9997	1	0	0	1	0	0	0	1
1143	1	2	8	4	13	0	0	1	0	0	0	0	1
1144	2	1	7	3	9	1	0	0	1	1	0	0	0
1145	6	25	1	23	69	0	1	0	0	0	1	0	0
1146	3	2	1	11	32	0	1	0	0	0	0	0	1
1147	10	120	0	45	136	0	0	0	1	1	0	0	0
1148	3	2	6	10	29	0	0	0	0	1	0	0	0
1149	2	2	5	4	13	0	0	0	0	1	0	0	0
1150	3	2	5	10	29	0	0	0	0	1	0	0	0
1151	9	12	6	27	81	0	0	0	0	1	0	0	0
1152	14	31	6	63	190	0	0	0	0	1	0	0	0
1153	41	39	7	126	374	0	0	0	1	0	1	0	0
1154	28	27	6	83	249	1	0	0	0	0	1	0	0
1155	26	61	8	161	483	0	0	0	0	1	0	0	0
1156	10	17	4	30	82	0	0	0	0	1	0	0	0
1157	0.6	0.6	5	1	3	0	0	0	0	0	0	0	1
1158	4	0	4	11	34	1	0	0	0	0	0	1	0
1159	5	13	6	18	54	1	0	0	0	0	0	1	0
1160	13	14	3	58	173	1	0	0	1	1	0	0	0
1161	13	11	2	61	183	1	0	0	1	1	0	0	0
1162	38	35	5	163	489	0	0	0	0	1	0	0	0
1163	4	1	2	12	37	0	0	0	0	1	0	0	0
1164	4	2	4	12	36	1	0	0	0	0	0	1	0
1165	4	2	3	12	36	1	0	0	0	0	0	1	0
1166	4	2	2	12	36	1	0	0	0	0	0	1	0
1167	4	3	13	11	32	1	0	0	0	0	0	1	0
1168	21	21	7	78	233	0	0	0	0	0	1	0	0
1169	4	3	8	12	35	1	0	0	0	1	0	0	0
1170	21	57	3	81	244	0	0	0	0	1	0	0	0
1171	8	10	4	30	89	0	0	0	0	1	0	0	0
1172	3	3	10	9	26	1	0	0	0	0	0	0	1
1173	32	21	7	117	352	1	0	1	0	0	1	0	0
1174	13	26	4	46	139	1	0	0	0	1	0	0	0
1175	7	9	3	23	70	0	0	0	0	1	0	0	0
1176	6	9	3	23	70	0	0	0	0	1	0	0	0
1177	23	26	5	83	236	1	0	0	0	1	0	0	0
1178	21	35	5	83	236	1	0	0	0	1	0	0	0
1179	6	5	3	12	35	1	1	1	0	0	0	1	0
1180	5	5	1	12	35	1	1	1	0	0	0	1	0
1181	20	25	3	70	202	1	0	0	1	1	0	0	0
1182	5	1	12	12	30	1	0	0	1	0	0	0	1
1183	15	16	1	60	181	0	0	0	1	0	1	0	0
1184	12	20	9	35	105	0	0	0	1	0	1	0	0
1185	26	19	3	105	312	0	0	0	0	1	0	0	0
1186	12	18	1	49	147	1	0	0	0	1	0	0	0
1187	15	18	3	51	154	1	0	0	0	1	0	0	0
1188	14	14	2	51	154	1	0	0	0	1	0	0	0
1189	4	6.1	7	15	44	1	0	0	0	1	0	0	0
1190	2	1	8	4	11	1	0	0	0	0	0	0	1
1191	10	22	3	31	92	1	0	0	0	1	0	0	0
1192	9	13	3	35	104	1	1	0	1	0	1	0	0
1193	9	13	2	35	104	1	1	0	1	0	1	0	0
1194	11	14	8	29	81	1	1	0	0	1	0	0	0
1195	11	11	6	39	116	1	1	0	0	1	0	0	0
1196	6	11	4	27	80	0	0	0	0	1	0	0	0
1197	6	8	2	24	73	0	0	0	0	1	0	0	0
1198	0.6	0.9	3	1.5	4.5	0	0	0	0	0	0	1	0
1199	27	34	4	79	236	1	0	0	1	1	0	0	0
1200	23	25	4	102	306	0	0	0	0	1	0	0	0
1201	42	53	2	300	900	0	0	0	0	1	0	0	0
1202	11	14	15	15	46	1	0	0	0	0	1	0	0
1203	0.9	0.9	5	1.5	4.5	1	0	0	0	0	0	0	1
1204	12	19	7	34	102	0	0	0	1	1	0	0	0
1205	18	35	5	109	327	0	0	0	1	1	0	0	0
1206	28	27	3	111	333	0	0	0	0	1	0	0	0
1207	2.400048	3.00006	4	5.0001	15.0003	0	0	0	0	0	0	0	1
1208	23	25	3	72	217	0	0	0	0	1	0	0	0
1209	3	3	7	9	28	0	0	0	0	1	0	0	0
1210	0.75	0.75	6	1.25	3.75	1	0	0	0	0	0	0	1
1211	8	13	3	35	104	0	0	0	0	1	0	0	0
1212	0.68574857	1.20006	2	2.0001	6.0003	0	0	0	0	1	0	0	0
1213	0.68574857	1.20006	2	2.0001	6.0003	0	0	0	0	1	0	0	0
1214	20	28	5	75	226	0	0	0	0	1	0	0	0
1215	44	36	3	233	699	1	0	1	0	0	1	0	0
1216	2.4	1.8	6	3	9	1	0	1	0	0	0	0	1
1217	16	19	1	61	184	0	0	0	0	1	0	0	0
1218	21	18	6	72	216	1	0	0	0	0	1	0	0
1219	12	7	10	29	85	1	0	0	0	1	0	0	0
1220	23	18	6	79	236	0	0	0	0	1	0	0	0
1221	11	20	4	39	116	0	0	0	1	1	0	0	0
1222	14	14	2	51	154	0	0	0	1	1	0	0	0
1223	8	11	2	23	67	1	0	0	1	1	0	0	0
1224	7	11	2	23	67	1	0	0	1	1	0	0	0
1225	7	11	1	23	67	1	0	0	1	1	0	0	0
1226	35	36	2	180	538	0	0	0	0	1	0	0	0
1227	53	52	3	191	573	1	0	0	1	1	0	0	0
1228	12	5	10	36	106	1	0	0	1	1	0	0	0
1229	4	3	8	14	41	0	0	0	0	1	0	0	0
1230	16	32	5	62	185	0	0	0	0	1	0	0	0
1231	25	32	5	74	223	0	0	0	0	0	1	0	0
1232	37	37	5	157	464	1	0	0	0	1	0	0	0
1233	9	8	10	24	71	1	0	0	0	1	0	0	0
1234	13	22	2	49	147	0	0	0	1	1	0	0	0
1235	5	7	13	12	35	1	0	1	0	0	0	1	0
1236	24	24	2	123	369	1	0	1	0	1	0	0	0
1237	2	2	20	4	12	1	0	0	0	0	0	1	0
1238	18	16	1	61	184	1	1	0	0	0	0	1	0
1239	21	31	1	115	345	0	0	0	0	1	0	0	0
1240	11	6	10	34	103	0	0	0	1	0	1	0	0
1241	6	2	2	20	61	1	0	0	0	1	0	0	0
1242	4	7	5	13	38	1	0	0	0	1	0	0	0
1243	6	7	13	13	40	0	0	0	0	1	0	0	0
1244	0.9	0.9	6	1.5	4.5	1	0	0	0	1	0	0	0
1245	7	10	7	20	60	1	0	0	0	1	0	0	0
1246	1.3713943	2.39994	4	3.9999	11.9997	0	0	0	1	1	0	0	0
1247	1.3713943	2.39994	2	3.9999	11.9997	0	0	0	1	1	0	0	0
1248	14	11	4	47	141	0	0	0	0	1	0	0	0
1249	11	14	5	43	129	0	0	0	0	1	0	0	0
1250	15	120	0	51	154	0	0	0	0	0	0	1	0
1251	1.0285714	1.8	2	3	9	0	0	0	0	1	0	0	0
1252	24	20	4	85	254	0	0	0	0	0	1	0	0
1253	2	2	5	6	17	0	0	0	0	0	0	0	1
1254	3	3	4	10	30	0	0	0	0	0	0	0	1
1255	5	5	3	17	51	1	1	0	0	1	0	0	0
1256	6	5	3	20	61	1	1	0	0	1	0	0	0
1257	12	22	2	41	124	1	0	0	0	1	0	0	0
1258	11	14	3	40	120	1	0	0	0	1	0	0	0
1259	0.85710857	1.49994	2	2.4999	7.4997	1	0	0	0	1	0	0	0
1260	24	57	2	124	373	0	1	0	0	1	0	0	0
1261	2	4	1	6	19	0	1	0	0	0	0	0	1
1262	8	14	7	23	68	1	1	0	0	0	1	0	0
1263	20	24	6	75	225	1	0	0	0	1	0	0	0
1264	9	5	5	32	95	1	0	0	0	1	0	0	0
1265	27	120	0	110	330	0	0	0	0	1	0	0	0
1266	44	35	8	145	421	0	0	0	0	1	0	0	0
1267	24	37	2	152	455	1	1	0	0	1	0	0	0
1268	7	9	8	27	81	1	1	0	0	1	0	0	0
1269	20	13	4	80	239	0	0	0	1	1	0	0	0
1270	27	20	5	96	291	0	0	0	0	1	0	0	0
1271	24	47	4	91	274	1	0	0	0	0	1	0	0
1272	0.6	0.9	3	1.5	4.5	1	0	0	0	0	1	0	0
1273	2	2	8	5	16	1	1	0	0	1	0	0	0
1274	0.9	0.9	5	1.5	4.5	1	1	0	0	1	0	0	0
1275	29	33	2	120	361	0	0	0	0	0	1	0	0
1276	0.45	0.45	5	0.75	2.25	0	0	0	0	0	0	0	1
1277	6	20	5	23	69	1	0	0	0	1	0	0	0
1278	16	44	1	68	205	0	0	0	0	1	0	0	0
1279	3	2	15	7	22	0	0	0	0	1	0	0	0
1280	0.68574857	1.20006	4	2.0001	6.0003	1	0	0	0	1	0	0	0
1281	51	73	3	242	726	0	0	0	1	1	0	0	0
1282	6	4	41	8	13	1	0	0	0	0	0	1	0
1283	17	46	3	58	174	1	0	0	0	1	0	0	0
1284	14	14	3	71	212	0	0	0	1	1	0	0	0
1285	0.77142857	1.35	2	2.25	6.75	1	0	0	0	0	0	0	1
1286	0.77142857	1.35	2	2.25	6.75	1	0	0	0	0	0	0	1
1287	6	14	4	23	70	1	0	1	0	1	0	0	0
1288	6	14	4	23	70	1	0	1	0	1	0	0	0
1289	10	11	10	31	94	1	0	0	1	1	0	0	0
1290	12	10	10	29	80	1	1	0	0	0	1	0	0
1291	16	24	11	46	139	0	0	0	0	1	0	0	0
1292	21	31	5	71	213	0	0	0	0	1	0	0	0
1293	3	2.25	6	3.75	11.25	0	0	0	0	1	0	0	0
1294	0.9	0.9	6	1.5	4.5	1	1	0	0	0	0	1	0
1295	9	4	13	21	63	0	0	0	0	1	0	0	0
1296	4	2	15	7	21	0	0	0	0	0	0	0	1
1297	8	13	12	24	73	0	0	0	0	1	0	0	0
1298	12	14	10	24	73	0	0	0	0	1	0	0	0
1299	5	4	2	22	65	0	0	0	1	1	0	0	0
1300	13	25	5	51	150	0	0	0	0	1	0	0	0
1301	0.85710857	1.49994	4	2.4999	7.4997	0	0	0	1	1	0	0	0
1302	0.79992	0.59994	8	0.9999	2.9997	0	0	0	0	0	1	0	0
1303	37	44	3	116	347	1	0	0	1	1	0	0	0
1304	7	2	2	22	67	1	0	0	0	1	0	0	0
1305	3	3	23	6	19	1	0	0	1	0	0	1	0
1306	8	9	4	25	73	0	0	0	0	1	0	0	0
1307	1.40004	2.10006	3	3.5001	10.5003	0	0	0	0	1	0	0	0
1308	9	12	3	29	84	0	0	0	0	1	0	0	0
1309	0.45	0.45	6	0.75	2.25	0	0	0	0	1	0	0	0
1310	0.9	1.35	3	2.25	6.75	0	0	0	0	0	0	0	1
1311	12	20	1	45	137	1	0	0	0	1	0	0	0
1312	29	53	4	114	342	0	0	0	0	1	0	0	0
1313	4.19994	4.19994	5	6.9999	20.9997	0	0	0	0	0	0	0	1
1314	47	40	7	147	441	1	0	0	0	0	1	0	0
1315	20	27	5	56	167	0	0	0	0	1	0	0	0
1316	3	1	10	8	23	0	0	0	0	0	0	1	0
1317	0.7	1.05	3	1.75	5.25	0	0	0	0	1	0	0	0
1318	38	36	3	180	538	1	0	0	0	1	0	0	0
1319	2.88	3.6	4	6	18	1	0	0	0	0	0	0	1
1320	4	4	7	10	29	0	0	0	1	0	0	1	0
1321	3	5	16	8	25	0	0	0	1	0	0	1	0
1322	28	28	2	105	314	0	1	0	0	0	1	0	0
1323	6	4	43	9	28	0	1	0	0	0	0	0	1
1324	26	29	2	111	332	1	0	0	1	1	0	0	0
1325	27	21	3	110	329	1	1	0	0	1	0	0	0
1326	18	21	7	46	137	1	0	0	0	1	0	0	0
1327	5.09994	5.09994	6	8.4999	25.4997	0	0	0	0	1	0	0	0
1328	19	12	5	50	152	0	0	0	0	1	0	0	0
1329	24	16	5	75	225	1	0	0	0	1	0	0	0
1330	12	7	10	40	120	1	1	1	0	0	0	1	0
1331	31	16	13	59	176	0	0	0	0	0	1	0	0
1332	5.4	2.7	10	4.5	13.5	0	0	0	0	0	0	0	1
1333	3.6	2.7	6	4.5	13.5	0	0	0	0	0	0	0	1
1334	12	11	5	39	117	1	0	0	1	0	1	0	0
1335	6.00012	3.00006	10	5.0001	15.0003	1	0	0	0	0	0	0	1
1336	4.00008	3.00006	6	5.0001	15.0003	1	0	0	0	0	0	0	1
1337	3.90006	3.90006	6	6.5001	19.5003	1	0	0	0	0	1	0	0
1338	3.120048	3.90006	4	6.5001	19.5003	1	0	0	0	0	1	0	0
1339	18	13	16	46	124	1	0	0	0	0	1	0	0
1340	2.60004	3.90006	5	6.5001	19.5003	0	0	0	0	1	0	0	0
1341	2.60004	3.90006	3	6.5001	19.5003	0	0	0	0	1	0	0	0
1342	20	20	11	48	143	0	0	0	1	1	0	0	0
1343	4.39992	3.29994	6	5.4999	16.4997	0	0	0	1	0	0	0	1
1344	6	10	10	20	60	1	0	0	0	0	0	0	1
1345	7.80012	3.90006	10	6.5001	19.5003	1	1	0	0	0	0	0	1
1346	5.20008	3.90006	6	6.5001	19.5003	1	1	0	0	0	0	0	1
1347	11	20	29	32	97	1	0	0	1	0	1	0	0
1348	15	22	5	51	152	1	0	0	0	0	1	0	0
1349	10	15	22	25	75	0	0	0	0	1	0	0	0
1350	8	5	11	21	64	1	0	0	0	1	0	0	0
1351	2.88	3.6	4	6	18	1	0	0	0	1	0	0	0
1352	18	10	18	21	62	0	0	0	1	1	0	0	0
1353	18	19	11	47	140	0	0	0	1	0	1	0	0
1354	13	11	7	33	98	0	0	0	0	1	0	0	0
1355	21	20	2	63	188	1	1	0	0	1	0	0	0
1356	3.00006	3.00006	6	5.0001	15.0003	0	0	0	0	1	0	0	0
1357	11	8	9	38	114	0	0	0	0	1	0	0	0
1358	5.70006	5.70006	6	9.5001	28.5003	0	0	0	1	1	0	0	0
1359	11	6	6	28	85	1	0	0	0	1	0	0	0
1360	8	6	4	31	93	0	1	0	0	1	0	0	0
1361	2.60004	3.90006	3	6.5001	19.5003	0	1	0	0	1	0	0	0
1362	4.00008	3.00006	8	5.0001	15.0003	0	0	0	0	1	0	0	0
1363	3.00006	3.00006	5	5.0001	15.0003	0	0	0	0	1	0	0	0
1364	34	32	3	123	369	0	0	0	0	1	0	0	0
1365	3.19992	2.39994	6	3.9999	11.9997	0	0	0	0	0	0	0	1
1366	16	16	28	40	119	0	0	0	0	1	0	0	0
1367	41	52	8	196	589	0	0	0	0	1	0	0	0
1368	0.45	0.45	5	0.75	2.25	0	0	0	0	0	0	0	1
1369	13	18	7	39	116	0	1	0	0	1	0	0	0
1370	2.88	3.6	4	6	18	0	1	0	0	1	0	0	0
1371	37	35	5	92	277	0	0	0	0	1	0	0	0
1372	10	16	4	40	121	0	0	0	0	1	0	0	0
1373	10	16	3	40	121	0	0	0	0	1	0	0	0
1374	11	7	20	24	71	1	1	0	0	0	0	0	1
1375	12	8	7	29	86	1	0	0	1	1	0	0	0
1376	19	7	12	47	142	1	0	0	0	1	0	0	0
1377	6	2	43	11	33	1	0	0	0	0	0	0	1
1378	25	29	12	72	217	1	0	0	0	1	0	0	0
1379	4.39992	3.29994	6	5.4999	16.4997	1	1	0	0	0	0	0	1
1380	21	23	7	58	173	1	0	0	0	1	0	0	0
1381	8	4	5	33	99	1	0	0	0	1	0	0	0
1382	9	10	3	30	88	0	0	0	0	1	0	0	0
1383	11	5	53	13	39	0	0	0	1	1	0	0	0
1384	8	5	64	13	39	0	0	0	1	0	1	0	0
1385	9	4	17	14	42	0	0	0	0	0	0	1	0
1386	10	9	18	16	47	1	0	0	0	0	1	0	0
1387	14	7	10	34	101	0	0	0	1	1	0	0	0
1388	44	35	8	69	206	0	0	0	0	1	0	0	0
1389	16	18	4	51	153	1	0	1	0	1	0	0	0
1390	4	7	21	8	23	0	0	0	0	0	0	1	0
1391	1.99992	1.49994	6	2.4999	7.4997	0	0	0	0	0	0	1	0
1392	16	17	18	25	74	1	1	0	0	0	1	0	0
1393	26	21	18	40	121	0	0	0	0	1	0	0	0
1394	23	28	11	64	192	0	0	0	0	1	0	0	0
1395	8	6	5	19	58	1	0	0	0	1	0	0	0
1396	3.120048	3.90006	4	6.5001	19.5003	1	0	0	0	0	0	0	1
1397	6	4	5	16	47	1	0	0	0	1	0	0	0
1398	23	23	12	52	155	0	0	0	0	0	1	0	0
1399	11	7	16	24	71	1	0	0	0	0	0	0	1
1400	16	20	2	70	212	1	0	0	0	1	0	0	0
1401	16	20	5	70	212	1	0	0	0	1	0	0	0
1402	2.60004	3.90006	5	6.5001	19.5003	0	0	0	0	0	0	1	0
1403	2.60004	3.90006	3	6.5001	19.5003	0	0	0	0	0	0	1	0
1404	2.60004	3.90006	3	6.5001	19.5003	0	0	0	0	0	0	1	0
1405	6	2	43	11	33	0	0	0	0	0	0	0	1
1406	18	17	10	42	124	0	0	0	0	1	0	0	0
1407	9	10	26	18	55	0	0	0	0	0	0	0	1
1408	23	18	4	71	213	0	0	0	0	0	0	1	0
1409	3.120048	3.90006	4	6.5001	19.5003	0	0	0	0	1	0	0	0
1410	3.90006	3.90006	6	6.5001	19.5003	0	0	0	0	1	0	0	0
1411	13	20	21	34	103	0	0	0	0	0	0	1	0
1412	2.80008	2.10006	6	3.5001	10.5003	0	0	0	0	0	0	1	0
1413	2.0571429	3.6	4	6	18	1	0	0	0	0	0	0	1
1414	23	31	6	90	272	0	0	0	0	1	0	0	0
1415	12	11	17	18	55	1	0	0	0	0	1	0	0
1416	2.80008	2.10006	6	3.5001	10.5003	1	0	0	0	0	0	0	1
1417	38	43	12	64	193	0	0	0	1	1	0	0	0
1418	16	17	18	25	74	1	0	0	0	0	1	0	0
1419	2.4	1.8	6	3	9	1	0	0	0	0	0	0	1
1420	3.19992	2.39994	6	3.9999	11.9997	1	0	0	0	0	0	0	1
1421	21	20	19	30	89	0	0	0	1	1	0	0	0
1422	29	32	4	104	313	0	0	0	0	1	0	0	0
1423	3	5	6	7	20	0	0	0	0	1	0	0	0
1424	20	16	5	68	204	0	0	0	1	0	1	0	0
1425	3.90006	3.90006	5	6.5001	19.5003	0	0	0	1	1	0	0	0
1426	11	4	5	36	106	0	0	0	0	1	0	0	0
1427	8	10	21	15	45	1	0	0	0	0	0	1	0
1428	2.4	1.8	6	3	9	1	0	0	0	0	0	0	1
1429	23	25	13	74	220	1	0	0	0	1	0	0	0
1430	25	16	13	60	181	0	0	0	1	1	0	0	0
1431	23	24	12	49	148	0	0	0	0	1	0	0	0
1432	7	3	64	11	34	0	0	0	0	0	0	0	1
1433	8	11	22	20	61	1	0	0	0	0	0	1	0
1434	14	11	17	18	53	0	0	0	1	0	1	0	0
1435	4.00008	3.00006	6	5.0001	15.0003	0	0	0	1	0	0	0	1
1436	49	26	7	107	322	0	0	0	1	0	1	0	0
1437	8	18	6	18	55	0	0	0	0	0	1	0	0
1438	33	19	6	64	192	0	0	0	0	1	0	0	0
1439	12	14	5	33	98	0	0	0	0	1	0	0	0
1440	12	18	4	32	96	1	0	0	0	1	0	0	0
1441	30	33	4	115	344	0	0	0	0	1	0	0	0
1442	40	49	3	153	431	0	0	0	0	1	0	0	0
1443	30	47	6	113	316	0	0	0	0	1	0	0	0
1444	10	17	25	21	64	0	0	0	0	1	0	0	0
1445	28	36	2	78	235	0	1	0	0	0	1	0	0
1446	21	15	6	63	189	1	0	0	0	1	0	0	0
1447	2.7	2.7	6	4.5	13.5	0	0	0	0	1	0	0	0
1448	2.16	2.7	4	4.5	13.5	0	0	0	0	0	0	0	1
1449	25	37	7	137	412	0	0	0	0	1	0	0	0
1450	33	39	7	137	412	0	0	0	0	1	0	0	0
1451	7	4	4	14	43	1	0	0	1	1	0	0	0
1452	32	21	9	71	201	1	0	0	0	0	1	0	0
1453	11	10	17	15	45	0	0	1	0	0	0	1	0
1454	11	10	18	15	45	0	0	1	0	0	0	1	0
1455	2.88	3.6	4	6	18	0	0	0	0	0	0	0	1
1456	5	2	8	17	51	1	0	0	0	1	0	0	0
1457	3.19992	2.39994	6	3.9999	11.9997	0	0	0	0	0	0	0	1
1458	0.99996	1.49994	5	2.4999	7.4997	1	0	0	1	1	0	0	0
1459	1.2	1.8	3	3	9	1	1	0	0	0	0	0	1
1460	24	25	28	60	180	1	1	0	0	0	1	0	0
1461	3.19992	2.39994	6	3.9999	11.9997	0	0	0	0	0	0	0	1
1462	15	9	14	46	137	0	0	0	0	1	0	0	0
1463	2.60004	3.90006	5	6.5001	19.5003	1	0	0	0	0	0	0	1
1464	36	24	14	64	192	0	0	0	0	0	1	0	0
1465	13	19	3	39	116	0	0	0	0	1	0	0	0
1466	8	2	8	21	63	0	0	0	0	1	0	0	0
1467	4	3	1	14	42	0	0	0	0	1	0	0	0
1468	5.20008	3.90006	8	6.5001	19.5003	1	0	0	1	1	0	0	0
1469	3.90006	3.90006	5	6.5001	19.5003	1	0	0	1	1	0	0	0
1470	16	9	20	19	58	0	0	0	1	0	0	1	0
1471	19	18	28	25	76	1	1	1	0	0	1	0	0
1472	31	24	14	62	187	0	0	0	1	1	0	0	0
1473	25	29	13	57	163	0	0	0	0	0	1	0	0
1474	3.90006	3.90006	6	6.5001	19.5003	0	0	0	0	1	0	0	0
1475	31	34	16	53	159	0	0	0	0	0	1	0	0
1476	20	17	24	26	78	1	0	0	0	1	0	0	0
1477	11	6	5	37	110	1	0	0	0	0	1	0	0
1478	12	11	52	18	55	0	0	0	0	0	0	1	0
1479	21	14	2	83	249	0	0	0	0	1	0	0	0
1480	1.919952	2.39994	4	3.9999	11.9997	0	0	0	0	0	0	0	1
1481	6	5	21	13	38	0	0	0	1	1	0	0	0
1482	25	11	39	34	103	0	0	0	0	1	0	0	0
1483	28	15	22	38	116	1	0	0	0	1	0	0	0
1484	12	18	25	28	85	1	0	0	0	1	0	0	0
1485	9	12	6	18	55	1	0	0	0	0	1	0	0
1486	2.80008	2.10006	6	3.5001	10.5003	1	0	0	0	0	1	0	0
1487	17	15	8	27	80	0	0	0	0	0	1	0	0
1488	3.19992	2.39994	6	3.9999	11.9997	0	0	0	0	0	0	0	1
1489	12	9	24	18	55	0	0	0	0	0	1	0	0
1490	7	6	1	22	68	0	0	0	0	0	0	1	0
1491	7	6	1	22	68	0	0	0	0	1	0	0	0
1492	9	15	7	17	52	1	0	0	0	0	1	0	0
1493	17	16	1	75	225	1	0	1	0	1	0	0	0
1494	13	15	11	25	73	1	0	0	0	1	0	0	0
1495	13	16	42	25	73	1	0	0	0	1	0	0	0
1496	8	2	13	20	60	0	0	0	0	1	0	0	0
1497	1.71432	3.00006	4	5.0001	15.0003	0	0	0	1	1	0	0	0
1498	1.71432	3.00006	2	5.0001	15.0003	0	0	0	1	0	0	1	0
1499	1.2857143	2.25	4	3.75	11.25	1	0	0	1	1	0	0	0
1500	15	25	5	58	176	1	0	0	1	1	0	0	0
1501	1.2857143	2.25	2	3.75	11.25	1	0	0	1	1	0	0	0
1502	21	25	4	82	244	0	0	0	0	0	1	0	0
1503	13	24	44	35	104	0	0	1	0	0	1	0	0
1504	6.00012	3.00006	10	5.0001	15.0003	0	0	0	0	0	1	0	0
1505	4.00008	3.00006	6	5.0001	15.0003	0	0	0	0	0	0	0	1
1506	1.40004	2.10006	5	3.5001	10.5003	1	0	1	0	1	0	0	0
1507	29	12	6	54	162	1	1	0	0	0	1	0	0
1508	5	8	22	10	30	1	1	0	0	0	1	0	0
1509	10	9	4	32	94	0	0	0	0	0	0	1	0
1510	10	15	11	29	87	0	0	0	0	1	0	0	0
1511	10	21	15	29	87	0	0	0	0	1	0	0	0
1512	19	26	5	68	204	0	0	0	0	1	0	0	0
1513	6.59988	3.29994	10	5.4999	16.4997	0	0	0	0	0	0	0	1
1514	3.40008	2.55006	6	4.2501	12.7503	0	0	0	1	0	0	0	1
1515	3.40008	2.55006	6	4.2501	12.7503	0	0	0	1	1	0	0	0
1516	3.6	3.6	6	6	18	1	1	0	0	0	0	0	1
1517	21	6	35	30	89	0	0	0	0	0	0	1	0
1518	6.59988	3.29994	10	5.4999	16.4997	1	0	0	0	0	0	0	1
1519	20	16	22	27	81	0	0	0	0	0	1	0	0
1520	2.80008	2.10006	6	3.5001	10.5003	0	0	0	0	0	0	0	1
1521	4	5	21	6	18	0	0	0	0	0	0	0	1
1522	30	19	7	72	216	0	0	0	0	0	1	0	0
1523	11	13	5	40	120	1	0	0	1	1	0	0	0
1524	3.6	2.7	6	4.5	13.5	1	1	0	0	0	0	0	1
1525	3.6	2.7	6	4.5	13.5	1	1	0	0	0	0	0	1
1526	29	25	9	73	219	0	0	0	1	0	1	0	0
1527	2.88	3.6	4	6	18	0	0	0	1	0	0	0	1
1528	5.10012	2.55006	10	4.2501	12.7503	0	0	0	0	0	0	0	1
1529	3.40008	2.55006	6	4.2501	12.7503	0	0	0	0	1	0	0	0
1530	22	8	18	37	110	0	0	0	0	1	0	0	0
1531	19	29	10	69	206	1	0	0	0	1	0	0	0
1532	12	18	5	48	146	0	0	0	0	1	0	0	0
1533	7	13	6	28	85	0	0	0	0	1	0	0	0
1534	5	10	14	15	44	0	0	0	0	1	0	0	0
1535	5	5	8	15	44	0	0	0	0	0	0	0	1
1536	4	5	8	7	20	0	0	0	1	1	0	0	0
1537	10	12	17	30	91	0	0	0	1	1	0	0	0
1538	2.7	2.7	6	4.5	13.5	0	1	0	0	0	0	1	0
1539	2.16	2.7	4	4.5	13.5	0	1	0	0	0	0	1	0
1540	70	52	6	256	767	1	0	0	1	1	0	0	0
1541	32	22	13	52	155	0	0	0	1	1	0	0	0
1542	26	14	9	79	237	0	0	0	0	1	0	0	0
1543	4.560048	5.70006	4	9.5001	28.5003	0	0	0	0	1	0	0	0
1544	13	11	4	35	104	1	0	1	0	0	1	0	0
1545	4.00008	3.00006	6	5.0001	15.0003	1	1	0	0	0	0	0	1
1546	2.4	1.8	6	3	9	0	0	0	0	0	0	0	1
1547	17	25	6	57	172	1	0	0	0	0	1	0	0
1548	11	12	22	23	68	1	0	0	0	0	1	0	0
1549	11	8	17	15	46	0	0	0	0	1	0	0	0
1550	13	12	20	33	98	0	0	0	0	0	0	0	1
1551	21	11	16	30	92	1	0	0	1	1	0	0	0
1552	17	22	17	28	83	0	0	0	0	0	0	1	0
1553	2.80008	2.10006	6	3.5001	10.5003	0	0	0	0	0	0	0	1
1554	21	23	3	70	202	0	0	1	0	1	0	0	0
1555	6	7	21	12	35	0	0	1	0	1	0	0	0
1556	9	5	52	13	38	0	0	0	1	0	1	0	0
1557	6	7	43	10	28	0	0	0	1	0	0	0	1
1558	11	15	13	24	72	0	0	0	0	1	0	0	0
1559	7	4	26	9	28	1	1	0	0	0	1	0	0
1560	20	11	13	53	160	1	0	0	0	0	1	0	0
1561	39	25	11	85	256	1	0	0	0	1	0	0	0
1562	19	16	12	80	239	0	0	0	1	1	0	0	0
1563	8	7	18	14	40	1	0	0	0	1	0	0	0
1564	8	6	8	22	65	0	1	0	0	1	0	0	0
1565	8	6	5	22	65	0	1	0	0	1	0	0	0
1566	28	23	20	42	126	0	0	0	0	0	0	0	1
1567	11	8	28	22	67	0	0	0	0	0	0	0	1
1568	40	45	5	129	386	0	0	0	0	1	0	0	0
1569	2.400048	3.00006	4	5.0001	15.0003	0	0	0	0	0	0	0	1
1570	3.19992	2.39994	6	3.9999	11.9997	0	0	0	0	1	0	0	0
1571	16	21	5	51	152	1	1	0	0	0	1	0	0
1572	27	31	16	54	155	0	0	0	0	1	0	0	0
1573	64	86	3	309	928	0	0	0	0	1	0	0	0
1574	5	15	4	17	51	0	0	0	0	1	0	0	0
1575	63	85	5	309	928	0	0	0	0	1	0	0	0
1576	64	85	3	309	928	0	0	0	0	1	0	0	0
1577	17	14	18	23	70	0	0	0	1	0	1	0	0
1578	14	12	18	18	53	1	0	1	0	0	0	1	0
1579	1.99992	1.49994	6	2.4999	7.4997	1	0	0	0	0	0	0	1
1580	10	8	26	18	52	0	0	0	1	0	0	0	1
1581	13	8	25	18	52	0	0	0	1	0	0	0	1
1582	18	12	28	26	80	1	0	0	0	0	1	0	0
1583	12	3	52	11	34	1	0	0	0	0	0	0	1
1584	9	8	3	35	106	0	0	0	0	0	1	0	0
1585	16	12	17	22	56	0	0	0	1	0	1	0	0
1586	11	17	21	23	68	0	0	0	1	0	0	0	1
1587	24	19	8	55	164	0	0	0	0	1	0	0	0
1588	6.59988	3.29994	10	5.4999	16.4997	1	0	1	0	0	0	0	1
1589	4.39992	3.29994	6	5.4999	16.4997	1	0	1	0	0	0	0	1
1590	2.80008	2.10006	6	3.5001	10.5003	1	0	0	0	0	0	0	1
1591	21	15	7	69	206	0	0	0	0	1	0	0	0
1592	18	13	10	42	125	0	0	0	0	0	1	0	0
1593	3.00006	3.00006	5	5.0001	15.0003	0	0	0	0	0	0	0	1
1594	9	11	22	18	55	0	0	0	0	0	0	1	0
1595	4.39992	3.29994	6	5.4999	16.4997	0	0	0	0	0	0	0	1
1596	3.19992	2.39994	6	3.9999	11.9997	1	0	0	0	0	0	0	1
1597	4.79988	2.39994	10	3.9999	11.9997	1	0	0	0	0	0	0	1
1598	16	14	19	22	62	1	0	0	0	0	1	0	0
1599	2.80008	2.10006	6	3.5001	10.5003	1	0	0	0	0	0	0	1
1600	2.80008	2.10006	6	3.5001	10.5003	1	0	0	0	0	0	0	1
1601	18	7	38	21	62	1	0	0	1	0	1	0	0
1602	20	10	17	20	56	0	0	0	0	0	1	0	0
1603	6	2	43	11	33	0	0	0	0	0	1	0	0
1604	4.39992	3.29994	8	5.4999	16.4997	0	0	0	1	0	0	0	1
1605	3.29994	3.29994	5	5.4999	16.4997	0	0	0	1	0	0	0	1
1606	9	4.5	10	7.5	22.5	1	0	0	0	0	1	0	0
1607	6	4.5	6	7.5	22.5	1	0	0	0	0	0	0	1
1608	39	25	6	129	388	0	0	0	0	0	1	0	0
1609	11	16	21	23	68	0	0	0	0	0	0	0	1
1610	20	15	12	71	214	0	0	0	0	1	0	0	0
1611	18	6	9	61	182	0	0	0	0	1	0	0	0
1612	14	5	13	36	106	1	0	0	0	1	0	0	0
1613	10	13	13	24	71	1	0	0	0	1	0	0	0
1614	3.20004	4.80006	5	8.0001	24.0003	1	0	0	0	1	0	0	0
1615	37	34	2	177	530	1	0	0	0	1	0	0	0
1616	12	13	14	24	71	0	0	0	0	1	0	0	0
1617	10	13	13	24	71	0	0	0	0	1	0	0	0
1618	12	13	14	24	71	0	0	0	1	0	0	1	0
1619	6	4.5	6	7.5	22.5	0	0	0	1	1	0	0	0
1620	4.39992	3.29994	8	5.4999	16.4997	0	0	0	0	0	0	0	1
1621	3.29994	3.29994	5	5.4999	16.4997	0	0	0	0	0	0	0	1
1622	40	35	7	144	432	0	0	0	0	0	1	0	0
1623	6	4.5	6	7.5	22.5	1	0	0	0	0	0	1	0
1624	43	31	5	142	426	1	0	0	0	0	1	0	0
1625	2.80008	2.10006	6	3.5001	10.5003	1	0	0	0	0	0	0	1
1626	12	13	14	24	71	0	0	0	0	0	0	1	0
1627	63	37	5	187	562	0	0	0	0	1	0	0	0
1628	2.88	3.6	4	6	18	0	0	0	0	0	0	0	1
1629	15	17	14	30	91	0	0	0	1	1	0	0	0
1630	11	3	8	30	91	0	0	0	1	1	0	0	0
1631	11	5	11	30	91	0	0	0	1	0	0	1	0
1632	15	5	10	30	91	0	0	0	0	0	1	0	0
1633	4.39992	3.29994	8	5.4999	16.4997	0	0	0	0	1	0	0	0
1634	30	34	10	127	382	0	0	0	0	1	0	0	0
1635	53	40	4	187	562	1	1	0	0	1	0	0	0
1636	21	21	4	91	274	0	0	0	0	1	0	0	0
1637	10	13	13	24	71	1	0	0	0	0	1	0	0
1638	21	17	14	54	161	1	0	0	1	0	1	0	0
1639	8	5	4	28	82	0	0	0	0	0	1	0	0
1640	20	22	6	80	240	1	0	0	0	1	0	0	0
1641	63	37	5	187	562	1	1	0	0	0	1	0	0
1642	6	4.5	6	7.5	22.5	1	1	0	0	0	0	0	1
1643	61	32	6	168	504	1	0	0	0	1	0	0	0
1644	22	14	11	61	182	0	0	0	0	0	1	0	0
1645	51	40	4	152	458	1	0	0	1	1	0	0	0
1646	4.39992	3.29994	8	5.4999	16.4997	1	0	0	0	1	0	0	0
1647	15	17	14	30	91	1	0	0	0	0	0	1	0
1648	6	4.5	6	7.5	22.5	1	0	0	0	0	0	1	0
1649	3.20004	4.80006	3	8.0001	24.0003	0	0	0	0	1	0	0	0
1650	3.20004	4.80006	3	8.0001	24.0003	0	0	0	0	0	0	0	1
1651	3.20004	4.80006	3	8.0001	24.0003	0	0	0	0	0	0	0	1
1652	10	13	4	24	71	0	0	0	0	0	0	1	0
1653	12	13	14	24	71	1	0	0	0	0	1	0	0
1654	6	4.5	6	7.5	22.5	1	0	0	0	0	0	0	1
1655	12	13	14	24	71	1	0	1	0	0	0	1	0
1656	71	52	5	242	727	1	0	0	0	0	1	0	0
1657	2.60004	3.90006	3	6.5001	19.5003	1	0	0	0	1	0	0	0
1658	3.29994	3.29994	5	5.4999	16.4997	0	0	0	0	0	0	1	0
1659	4.39992	3.29994	8	5.4999	16.4997	0	0	0	0	0	0	1	0
1660	25	29	3	108	305	0	0	0	0	1	0	0	0
1661	2.0571429	3.6	2	6	18	0	0	0	0	1	0	0	0
1662	31	34	2	159	477	1	0	0	0	1	0	0	0
1663	11	7	10	41	122	1	0	0	0	1	0	0	0
1664	26	42	2	116	347	1	0	0	0	1	0	0	0
1665	18	75	3	73	219	0	0	0	0	1	0	0	0
1666	18	28	2	73	219	0	0	0	0	1	0	0	0
1667	5.59992	4.19994	8	6.9999	20.9997	0	0	0	0	1	0	0	0
1668	19	13	2	72	216	0	0	0	0	1	0	0	0
1669	17	13	3	72	216	0	0	0	0	1	0	0	0
1670	0.99996	1.49994	5	2.4999	7.4997	1	0	0	0	0	0	0	1
1671	0.99996	1.49994	3	2.4999	7.4997	1	0	0	0	1	0	0	0
1672	60	64	3	255	764	0	0	0	1	1	0	0	0
1673	6	4.5	6	7.5	22.5	1	0	0	0	0	1	0	0
1674	7	2	2	23	69	1	1	0	0	1	0	0	0
1675	15	14	1	58	175	0	0	0	0	1	0	0	0
1676	2.5714286	4.5	2	7.5	22.5	1	0	0	0	0	0	1	0
1677	2.5714286	4.5	2	7.5	22.5	0	0	0	0	0	0	1	0
1678	2.5714286	4.5	2	7.5	22.5	0	0	0	0	0	0	1	0
1679	8	21	4	28	83	0	0	0	0	1	0	0	0
1680	1.3713943	2.39994	4	3.9999	11.9997	0	0	0	0	0	0	1	0
1681	1.3713943	2.39994	2	3.9999	11.9997	0	0	0	0	0	0	1	0
1682	22	18	7	73	218	0	0	0	0	1	0	0	0
1683	10	4	3	35	105	0	0	0	0	1	0	0	0
1684	9	20	4	36	108	0	0	0	0	1	0	0	0
1685	11	22	7	35	104	0	0	0	1	1	0	0	0
1686	2	1	2	5	16	0	0	0	1	1	0	0	0
1687	11	19	5	40	120	0	0	0	1	1	0	0	0
1688	25	32	2	143	428	0	0	0	1	1	0	0	0
1689	11	13	7	39	118	0	0	0	1	1	0	0	0
1690	1.0285714	1.8	4	3	9	0	0	0	0	0	0	0	1
1691	40	38	5	157	470	1	0	0	0	1	0	0	0
1692	25	18	6	89	266	0	1	0	0	0	1	0	0
1693	22	54	2	86	258	1	0	0	0	1	0	0	0
1694	10	5	18	26	78	1	1	0	0	0	1	0	0
1695	24	24	6	139	416	1	1	0	0	0	1	0	0
1696	45	35	6	209	610	1	0	1	0	0	1	0	0
1697	19	18	22	41	118	1	0	1	0	0	0	0	1
1698	59	36	4	240	719	1	0	1	0	0	1	0	0
1699	10	35	1	38	115	0	0	0	0	1	0	0	0
1700	10	35	2	38	115	0	0	0	0	1	0	0	0
1701	10	17	3	24	71	0	1	0	0	1	0	0	0
1702	4	12	4	18	55	0	0	0	0	1	0	0	0
1703	52	40	5	144	433	0	0	0	0	1	0	0	0
1704	4	14	3	10	31	0	0	0	0	1	0	0	0
1705	2	1	5	4	14	0	0	0	0	1	0	0	0
1706	18	13	3	75	224	0	0	0	0	1	0	0	0
1707	17	15	2	75	224	0	0	0	0	1	0	0	0
1708	5	3	4	21	63	0	0	0	0	1	0	0	0
1709	7	19	3	24	70	0	0	0	0	1	0	0	0
1710	6	21	10	22	65	0	0	0	0	1	0	0	0
1711	19	19	3	94	281	0	0	0	1	1	0	0	0
1712	3.29994	3.29994	5	5.4999	16.4997	0	0	0	1	0	0	1	0
1713	21	55	3	108	325	0	0	0	0	1	0	0	0
1714	39	65	1	144	415	0	0	0	1	1	0	0	0
1715	53	38	5	148	443	1	0	1	0	0	1	0	0
1716	16	16	7	35	105	1	0	0	0	1	0	0	0
1717	9	7	16	24	71	1	0	0	0	1	0	0	0
1718	19	21	2	101	301	0	0	0	0	1	0	0	0
1719	39	46	2	266	793	1	0	0	0	0	1	0	0
1720	4	3	3	15	44	1	0	0	0	1	0	0	0
1721	38	38	3	255	766	0	1	0	0	1	0	0	0
1722	3	3	3	9	27	0	0	0	0	1	0	0	0
1723	16	17	4	54	163	0	0	0	0	1	0	0	0
1724	15	17	4	53	160	0	0	0	0	1	0	0	0
1725	6	11	2	17	52	0	0	0	0	1	0	0	0
1726	22	21	6	95	284	0	0	0	0	1	0	0	0
1727	19	12	1	69	208	0	0	0	0	1	0	0	0
1728	33	31	6	146	437	0	0	0	0	1	0	0	0
1729	33	32	2	146	437	0	0	0	0	1	0	0	0
1730	1	3	2	2	7	0	0	0	0	0	0	1	0
1731	3	2	12	6	19	0	0	0	0	1	0	0	0
1732	2	2	3	6	19	0	0	0	0	0	0	0	1
1733	5	2	20	12	33	0	0	0	0	0	0	0	1
1734	5	4	7	12	35	0	0	0	0	1	0	0	0
1735	6	2	41	7	20	0	0	0	0	1	0	0	0
1736	7	18	4	27	80	0	0	0	0	1	0	0	0
1737	7	17	4	27	80	0	0	0	0	1	0	0	0
1738	18	25	4	71	213	0	0	0	0	1	0	0	0
1739	9	4	2	31	92	0	0	0	0	1	0	0	0
1740	0.6	0.9	5	1.5	4.5	0	0	0	0	0	1	0	0
1741	7	7	2	25	75	0	0	0	0	0	0	0	1
1742	5	4	3	16	49	0	0	0	0	1	0	0	0
1743	5	3	2	16	49	0	0	0	0	1	0	0	0
1744	8	7	2	25	75	0	0	0	0	1	0	0	0
1745	5	5	1	16	49	0	0	0	0	1	0	0	0
1746	20	34	3	84	252	0	0	0	0	1	0	0	0
1747	7	2	3	21	63	0	0	0	0	0	0	0	1
1748	16	10	10	40	119	0	0	0	0	0	1	0	0
1749	12	19	5	47	142	1	0	0	0	1	0	0	0
1750	29	46	4	110	314	1	0	0	0	1	0	0	0
1751	30	31	1	127	379	0	0	0	0	1	0	0	0
1752	14	36	1	72	214	0	0	0	0	1	0	0	0
1753	14	20	3	72	214	0	0	0	0	1	0	0	0
1754	41	45	1	199	597	0	0	0	1	1	0	0	0
1755	10	13	3	42	125	0	0	0	0	1	0	0	0
1756	10	13	4	42	125	0	0	0	0	1	0	0	0
1757	6	11	3	28	83	0	0	0	0	1	0	0	0
1758	11	10	6	18	55	0	0	0	0	1	0	0	0
1759	6	11	2	14	43	0	0	0	0	1	0	0	0
1760	8	40	2	36	109	0	0	0	0	1	0	0	0
1761	34	58	3	128	385	1	0	1	0	1	0	0	0
1762	3	1	17	7	20	1	0	0	0	1	0	0	0
1763	3	1	12	7	20	1	0	0	0	0	0	0	1
1764	26	35	3	107	320	0	0	0	0	1	0	0	0
1765	4.39992	3.29994	6	5.4999	16.4997	0	0	0	0	0	0	0	1
1766	10	11	4	33	99	1	0	0	0	1	0	0	0
1767	10	11	4	33	99	1	0	0	0	1	0	0	0
1768	18	16	5	48	143	1	0	0	0	1	0	0	0
1769	1.3713943	2.39994	2	3.9999	11.9997	1	1	0	0	0	0	0	1
1770	3	2	6	11	32	0	0	0	1	1	0	0	0
1771	34	71	4	163	490	0	0	0	1	1	0	0	0
1772	28	32	2	120	359	0	0	0	1	1	0	0	0
1773	7	8	5	24	71	0	0	0	0	1	0	0	0
1774	16	19	4	70	210	1	0	0	0	1	0	0	0
1775	17	22	4	79	237	0	0	0	0	1	0	0	0
1776	3	5	8	8	25	0	0	0	0	1	0	0	0
1777	3	4	6	10	29	1	0	0	0	0	0	1	0
1778	3	4	6	10	29	1	0	0	0	0	0	1	0
1779	18	13	8	48	145	0	0	1	0	0	1	0	0
1780	16	11	4	61	182	0	0	0	1	1	0	0	0
1781	4	5	8	7	20	0	0	0	1	1	0	0	0
1782	1	2	13	2	8	0	0	0	1	0	0	0	1
1783	28	34	2	108	323	1	0	0	0	1	0	0	0
1784	1.49994	1.49994	5	2.4999	7.4997	1	0	0	0	0	0	0	1
1785	14	10	4	52	156	0	0	0	1	1	0	0	0
1786	15	25	3	52	156	0	0	0	1	1	0	0	0
1787	0.50004	0.75006	5	1.2501	3.7503	0	0	0	0	1	0	0	0
1788	5	9	7	15	44	0	0	0	0	1	0	0	0
1789	13	13	1	58	173	0	0	0	0	1	0	0	0
1790	20	30	2	73	220	0	0	1	0	1	0	0	0
1791	17	9	8	64	191	0	0	0	1	1	0	0	0
1792	18	19	12	68	203	0	0	0	1	1	0	0	0
1793	16	33	2	75	226	0	0	0	0	1	0	0	0
1794	2	3	8	7	21	0	0	0	0	1	0	0	0
1795	8	10	7	29	88	1	1	0	0	1	0	0	0
1796	37	43	4	205	589	1	0	0	0	0	1	0	0
1797	14	13	1	51	152	1	0	0	0	1	0	0	0
1798	1.2	1.8	3	3	9	1	0	1	0	0	0	0	1
1799	6	8	4	18	54	1	0	1	0	1	0	0	0
1800	6	8	3	21	62	1	0	1	0	1	0	0	0
1801	2	6	8	7	22	0	1	1	0	0	0	0	1
1802	12	6	2	44	133	0	0	0	0	0	0	1	0
1803	12	6	2	44	133	0	0	0	0	0	0	1	0
1804	15	16	2	60	180	0	1	1	0	1	0	0	0
1805	1.0285714	1.8	2	3	9	0	1	1	0	0	0	1	0
1806	0.8	1.2	3	2	6	0	1	1	0	1	0	0	0
1807	14	19	2	57	171	0	0	0	0	1	0	0	0
1808	13	19	2	60	181	0	0	0	0	1	0	0	0
1809	9	5	29	10	31	1	0	0	1	1	0	0	0
1810	14	12	7	42	126	1	0	0	1	1	0	0	0
1811	15	26	4	57	172	0	0	0	1	1	0	0	0
1812	14	21	1	57	172	0	0	0	1	1	0	0	0
1813	18	20	2	63	189	0	1	0	0	1	0	0	0
1814	17	16	4	63	188	0	1	0	0	1	0	0	0
1815	6	25	3	21	63	0	0	0	0	1	0	0	0
1816	6	25	3	21	63	0	0	0	0	1	0	0	0
1817	9	18	5	28	85	0	0	0	0	1	0	0	0
1818	1.2	1.8	3	3	9	0	0	0	0	1	0	0	0
1819	6	4	3	23	69	0	0	0	0	1	0	0	0
1820	1	1	6	4	11	0	0	0	0	1	0	0	0
1821	1.1142514	1.94994	2	3.2499	9.7497	0	0	0	0	1	0	0	0
1822	25	27	3	99	297	0	0	0	0	1	0	0	0
1823	4	4	3	16	48	0	0	0	0	1	0	0	0
1824	5	5	3	19	58	0	0	0	0	1	0	0	0
1825	62	58	3	335	1005	1	0	1	0	0	1	0	0
1826	19	29	5	76	228	1	0	0	0	0	1	0	0
1827	26	24	7	88	262	0	0	0	0	1	0	0	0
1828	0.3	0.3	5	0.5	1.5	0	0	0	0	0	0	0	1
1829	23	20	4	83	249	0	0	0	1	1	0	0	0
1830	3.90006	3.90006	5	6.5001	19.5003	0	0	0	1	0	0	0	1
1831	5	7	1	12	37	0	0	0	0	0	1	0	0
1832	23	13	4	108	324	0	0	0	0	1	0	0	0
1833	24	17	3	109	324	0	0	0	0	1	0	0	0
1834	25	30	6	85	254	1	0	0	0	1	0	0	0
1835	15	31	8	49	149	1	0	0	0	1	0	0	0
1836	0.68574857	1.20006	4	2.0001	6.0003	0	0	0	0	1	0	0	0
1837	0.68574857	1.20006	2	2.0001	6.0003	0	0	0	0	1	0	0	0
1838	15	21	2	56	168	0	0	0	0	1	0	0	0
1839	13	21	3	52	157	0	0	0	0	1	0	0	0
1840	21	38	1	81	242	0	0	0	1	1	0	0	0
1841	2	2	14	4	12	0	0	0	1	0	0	0	1
1842	1.3713943	2.39994	2	3.9999	11.9997	1	1	0	0	0	0	0	1
1843	1.3713943	2.39994	2	3.9999	11.9997	1	1	0	0	0	0	0	1
1844	0.3	0.3	5	0.5	1.5	1	0	0	0	0	0	0	1
1845	8	4	1	27	82	0	0	0	0	1	0	0	0
1846	9	4	2	31	94	0	0	0	0	1	0	0	0
1847	27	47	1	110	330	0	0	0	0	1	0	0	0
1848	1.3713943	2.39994	2	3.9999	11.9997	0	0	0	0	0	0	1	0
1849	12	15	5	43	128	0	1	0	0	1	0	0	0
1850	28	23	4	92	277	0	0	0	0	0	1	0	0
1851	4	3	15	10	29	0	0	0	0	0	0	0	1
1852	58	63	4	297	890	0	0	0	1	0	1	0	0
1853	19	19	5	75	226	0	1	0	0	1	0	0	0
1854	3.29994	3.29994	5	5.4999	16.4997	0	1	0	0	0	0	0	1
1855	5	3	7	19	56	1	0	0	0	1	0	0	0
1856	11	7	5	38	115	0	0	0	0	1	0	0	0
1857	2.400048	3.00006	4	5.0001	15.0003	0	0	0	0	0	0	0	1
1858	9	11	8	38	113	0	0	0	0	1	0	0	0
1859	30	39.5	2	155	464	0	0	0	1	1	0	0	0
1860	22	34	10	110	322	1	1	0	0	0	1	0	0
1861	37	23	8	118	354	1	0	0	0	1	0	0	0
1862	0.68574857	1.20006	4	2.0001	6.0003	0	0	0	0	0	0	1	0
1863	0.68574857	1.20006	4	2.0001	6.0003	0	0	0	0	0	0	1	0
1864	0.68574857	1.20006	2	2.0001	6.0003	0	0	0	0	0	0	1	0
1865	6	11	2	21	64	0	0	0	0	1	0	0	0
1866	44	37	8	136	401	0	0	0	0	1	0	0	0
1867	38	43	2	144	427	0	0	0	0	1	0	0	0
1868	12	19	2	40	119	1	0	0	0	1	0	0	0
1869	8	14	3	30	89	1	0	0	0	1	0	0	0
1870	28	56	3	110	330	1	0	0	0	1	0	0	0
1871	1.2857143	2.25	4	3.75	11.25	0	0	0	0	1	0	0	0
1872	1.2857143	2.25	2	3.75	11.25	0	0	0	0	1	0	0	0
1873	8	12	1	29	88	0	0	0	0	1	0	0	0
1874	4	3	3	11	33	1	1	0	0	1	0	0	0
1875	9	4	20	15	46	0	0	1	0	0	1	0	0
1876	4	9	7	11	28	1	0	1	0	0	0	0	1
1877	12	13	4	46	139	0	0	0	1	1	0	0	0
1878	7	4	5	20	57	0	0	0	1	1	0	0	0
1879	8	10	5	26	77	0	0	0	1	1	0	0	0
1880	0.77142857	1.35	2	2.25	6.75	0	0	0	1	1	0	0	0
1881	16	26	5	56	169	0	0	0	1	1	0	0	0
1882	11	12	4	40	121	0	0	0	1	1	0	0	0
1883	12	13	1	46	139	0	0	0	1	1	0	0	0
1884	15	87	1	56	167	0	1	0	0	1	0	0	0
1885	19	35	1	55	166	0	0	0	0	0	0	1	0
1886	27	57	7	137	412	1	1	1	0	0	1	0	0
1887	2.10006	2.10006	5	3.5001	10.5003	1	1	0	1	1	0	0	0
1888	17	16	4	50	149	1	0	1	0	1	0	0	0
1889	1.919952	2.39994	4	3.9999	11.9997	1	0	1	0	0	0	0	1
1890	2.39994	2.39994	6	3.9999	11.9997	1	0	1	0	0	0	0	1
1891	13	15	4	44	127	1	0	0	0	1	0	0	0
1892	30	41	3	188	538	0	0	0	0	1	0	0	0
1893	17	17	5	93	279	0	0	0	0	1	0	0	0
1894	32	28	8	140	421	0	0	0	1	1	0	0	0
1895	8	6	10	24	71	0	0	0	1	0	0	0	1
1896	14	13	2	46	139	0	0	0	0	1	0	0	0
1897	19	43	4	70	209	1	0	0	1	1	0	0	0
1898	2	1	2	5	16	1	0	0	1	1	0	0	0
1899	19	20	2	90	271	1	1	0	0	1	0	0	0
1900	5	7	1	19	58	0	0	0	0	1	0	0	0
1901	5	7	3	19	58	0	0	0	0	1	0	0	0
1902	32	28	2	133	400	0	0	0	1	1	0	0	0
1903	13	12	2	49	147	1	0	0	0	1	0	0	0
1904	13	24	2	52	155	1	0	0	0	1	0	0	0
1905	5	4	3	17	50	1	0	0	0	0	0	1	0
1906	5	4	3	17	50	1	0	0	0	1	0	0	0
1907	4	3	7	14	42	0	0	0	0	1	0	0	0
1908	4	3	5	14	42	0	0	0	0	1	0	0	0
1909	10	18	4	34	102	1	0	0	0	1	0	0	0
1910	19	14	3	92	276	0	1	0	0	1	0	0	0
1911	8	13	10	19	57	1	0	1	0	0	0	1	0
1912	6	6	17	13	34	1	0	1	0	0	0	1	0
1913	3	0	2	8	24	1	0	0	0	1	0	0	0
1914	11	14	4	48	145	0	0	0	0	1	0	0	0
1915	15	15	4	73	218	0	0	0	0	1	0	0	0
1916	9	8	4	33	98	0	0	0	1	1	0	0	0
1917	11	12	5	38	113	1	0	1	0	1	0	0	0
1918	9	12	5	34	101	1	0	1	0	1	0	0	0
1919	0.85710857	1.49994	4	2.4999	7.4997	0	0	0	0	1	0	0	0
1920	0.85710857	1.49994	2	2.4999	7.4997	0	0	0	0	1	0	0	0
1921	4	6	1	11	34	0	0	0	0	0	0	0	1
1922	1.2	1.8	5	3	9	0	0	0	0	1	0	0	0
1923	1.2	1.8	3	3	9	0	0	0	0	1	0	0	0
1924	1.2	1.8	3	3	9	0	0	0	0	1	0	0	0
1925	15	35	2	52	141	1	0	0	0	1	0	0	0
1926	26	50	3	102	306	0	0	0	1	1	0	0	0
1927	36	39	3	140	407	0	0	0	0	1	0	0	0
1928	10	19	3	36	107	0	0	0	0	1	0	0	0
1929	11	18	3	39	116	0	0	0	0	1	0	0	0
1930	30	46	3	103	309	0	0	0	0	1	0	0	0
1931	33	47	1	128	383	1	0	0	1	1	0	0	0
1932	19	16	6	40	121	0	0	0	0	1	0	0	0
1933	0.50004	0.75006	3	1.2501	3.7503	0	0	0	0	1	0	0	0
1934	26	28	4	130	389	0	0	0	0	1	0	0	0
1935	45	52	2	290	870	1	0	0	1	0	1	0	0
1936	19	24	2	65	195	0	0	0	0	1	0	0	0
1937	10	9	2	34	97	0	0	0	1	1	0	0	0
1938	11	19	4	41	122	0	0	0	1	1	0	0	0
1939	6	4	1	23	69	0	0	0	1	1	0	0	0
1940	22	39	2	87	261	1	0	0	0	1	0	0	0
1941	18	12	6	57	171	1	1	1	0	0	1	0	0
1942	42	55	3	156	469	0	0	1	0	1	0	0	0
1943	3.29994	3.29994	5	5.4999	16.4997	0	0	1	0	0	0	0	1
1944	0.9	0.9	6	1.5	4.5	1	0	0	0	1	0	0	0
1945	3	3	4	7	22	0	0	0	0	1	0	0	0
1946	3	3	5	7	22	0	0	0	0	1	0	0	0
1947	15	28	3	100	299	1	0	0	0	1	0	0	0
1948	7	2	4	13	39	0	0	0	1	1	0	0	0
1949	5	2	4	13	39	0	0	0	1	1	0	0	0
1950	3	6.5	1	8	25	0	0	0	0	1	0	0	0
1951	3	5	8	7	21	0	0	0	0	1	0	0	0
1952	21	46	1	105	312	0	1	0	0	1	0	0	0
1953	8	22	4	26	79	0	0	0	0	1	0	0	0
1954	9	20	3	29	88	0	0	0	0	1	0	0	0
1955	24	16	4	78	234	1	0	0	0	1	0	0	0
1956	21	13	3	78	234	1	0	0	0	1	0	0	0
1957	36	52	4	190	570	0	0	0	0	1	0	0	0
1958	32	34	8	117	345	0	0	0	0	1	0	0	0
1959	17	21	8	55	165	0	0	0	0	1	0	0	0
1960	17	21	5	55	165	0	0	0	0	1	0	0	0
1961	10	22	3	41	123	0	0	0	0	1	0	0	0
1962	4	6	8	11	34	0	0	0	0	1	0	0	0
1963	4	6	7	11	34	0	0	0	0	1	0	0	0
1964	3	5	5	6	19	0	0	0	0	0	0	1	0
1965	3	4	12	6	19	0	0	0	0	0	0	1	0
1966	3	3	7	9	28	0	0	0	1	1	0	0	0
1967	10	17	12	21	64	0	0	0	0	1	0	0	0
1968	6	3	6	20	59	1	0	0	0	1	0	0	0
1969	6	3	5	20	59	1	0	0	0	1	0	0	0
1970	29	39	2	181	544	0	0	0	0	1	0	0	0
1971	1	1.5	5	2.5	7.5	1	0	0	1	1	0	0	0
1972	4	10	1	9	28	0	0	0	0	1	0	0	0
1973	1.5428571	2.7	4	4.5	13.5	1	0	1	0	0	0	0	1
1974	30	38	5	121	364	0	0	0	1	1	0	0	0
1975	25	39	5	97	292	0	0	0	0	1	0	0	0
1976	26	36	2	98	295	1	1	0	0	1	0	0	0
1977	33	33	4	178	533	1	0	0	0	1	0	0	0
1978	0.3	0.3	5	0.5	1.5	1	0	0	0	0	0	0	1
1979	17	48	3	62	183	1	0	0	0	1	0	0	0
1980	19	12	5	66	198	0	0	0	0	1	0	0	0
1981	3	6	8	7	22	0	0	0	1	1	0	0	0
1982	17	25	6	62	186	0	0	0	0	1	0	0	0
1983	4	6	7	11	34	0	1	0	0	1	0	0	0
1984	2	3	8	6	17	0	0	0	0	0	0	1	0
1985	3	3	10	6	19	0	0	0	0	0	0	1	0
1986	6.00012	3.00006	10	5.0001	15.0003	0	0	0	0	0	0	0	1
1987	8	6	17	11	34	0	1	0	0	0	0	1	0
1988	6	7	21	11	34	0	1	0	0	0	0	1	0
1989	11	5	51	13	39	0	1	0	1	0	1	0	0
1990	11	5	51	13	39	0	1	0	1	0	0	0	1
1991	8	5	18	14	40	1	0	0	1	1	0	0	0
1992	4	5	21	6	18	1	0	0	0	0	0	0	1
1993	30	36	2	93	280	1	0	1	0	1	0	0	0
1994	42	24	7	144	432	0	0	0	1	0	1	0	0
1995	6.59988	3.29994	10	5.4999	16.4997	0	0	0	1	0	0	0	1
1996	4.39992	3.29994	6	5.4999	16.4997	0	0	0	1	0	0	1	0
1997	36	17	6	58	175	0	0	0	1	1	0	0	0
1998	24	38	4	75	226	1	0	0	0	1	0	0	0
1999	9	11	5	32	98	0	0	0	1	0	0	1	0
[truncated: 757 more rows]
